# Supplementary material for: Synthesis and biological evaluation of truncated α-tubulin-binding pironetin analogues lacking alkyl pendants in the side chain or the dihydropyrone ring
Source: Royal Society of Chemistry journal article supplement (doi:10.1039/c3ob40854j), 2013-01-01

# Synthesis and Biological Evaluation of $\alpha$ -Tubulin-binding Pironetin Analogues Lacking Alkyl Pendants in the Side Chain or the Pyrone Ring

Julián Paños,<sup>†</sup> Santiago Díaz-Oltra,<sup>†</sup> María Sánchez-Peris,<sup>†</sup> Jorge García-Pla,<sup>†</sup> Juan Murga,<sup>†</sup> Eva Falomir,<sup>†</sup> Miguel Carda,<sup>†</sup> Mariano Redondo-Horcajo,<sup>§</sup> J. Fernando Díaz,<sup>§</sup> Isabel Barasoain<sup>§</sup> and J. Alberto Marco<sup>‡</sup>

<sup>†</sup>*Depart. de Q. Inorgánica y Orgánica, Univ. Jaume I, 12080 Castellón, Spain;* <sup>§</sup>*CIB, CSIC, 28040 Madrid, Spain; and* <sup>‡</sup>*Depart. de Q. Orgánica, Univ. de Valencia, 46100 Burjassot, Valencia, Spain*

## *Supporting Information*

### *Contents:*

*S-2/S-32: NMR Spectra of compounds 13, 15-19 and 22-25. X-Ray analysis of compound 23.*

## NMR spectra of intermediate and final compounds

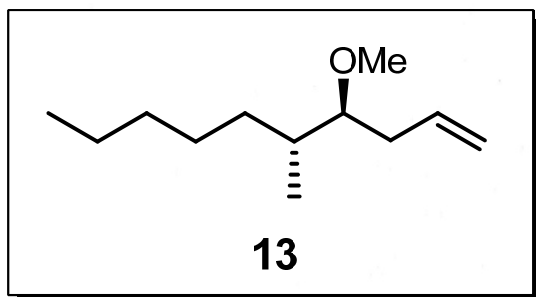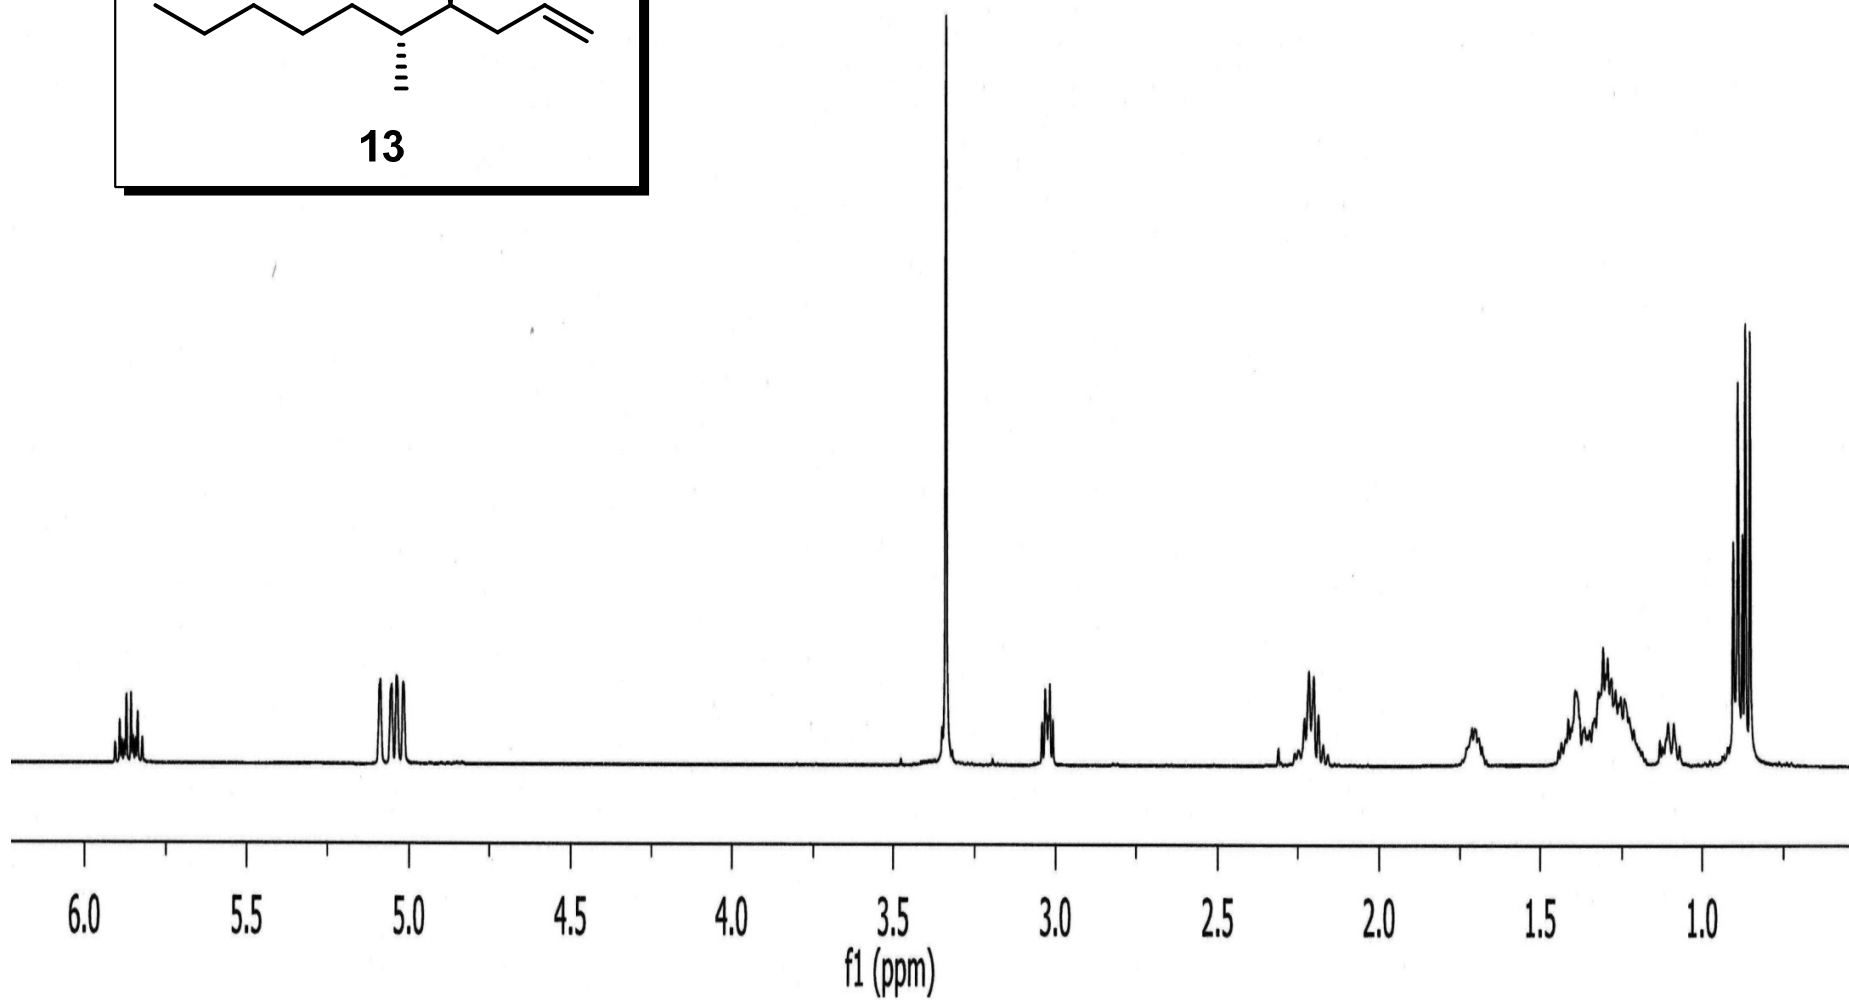

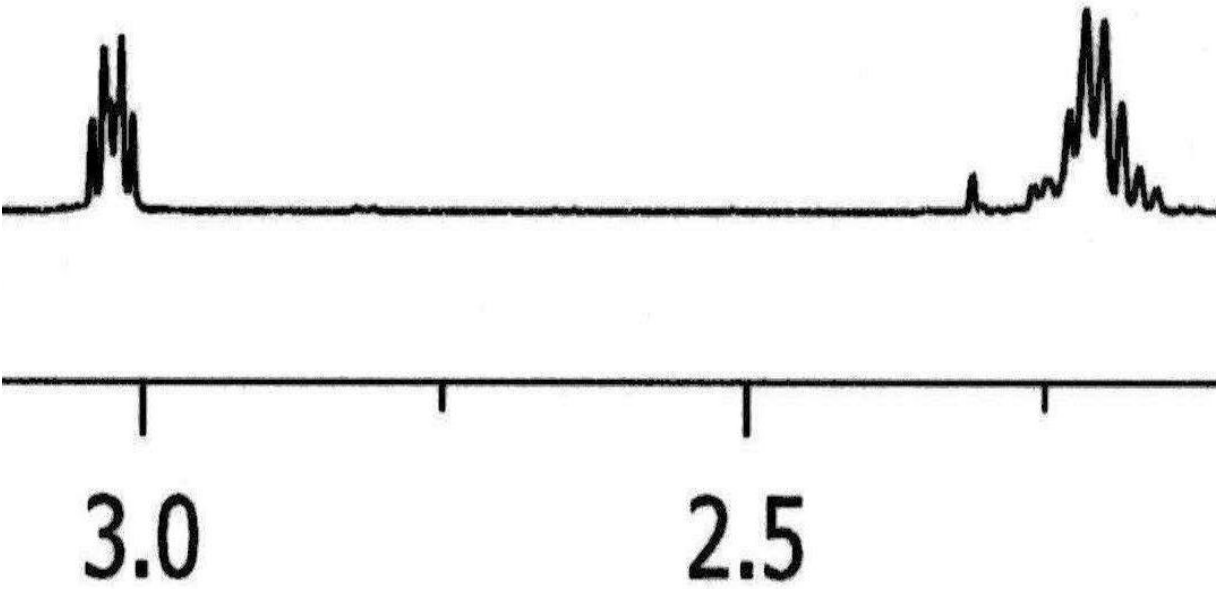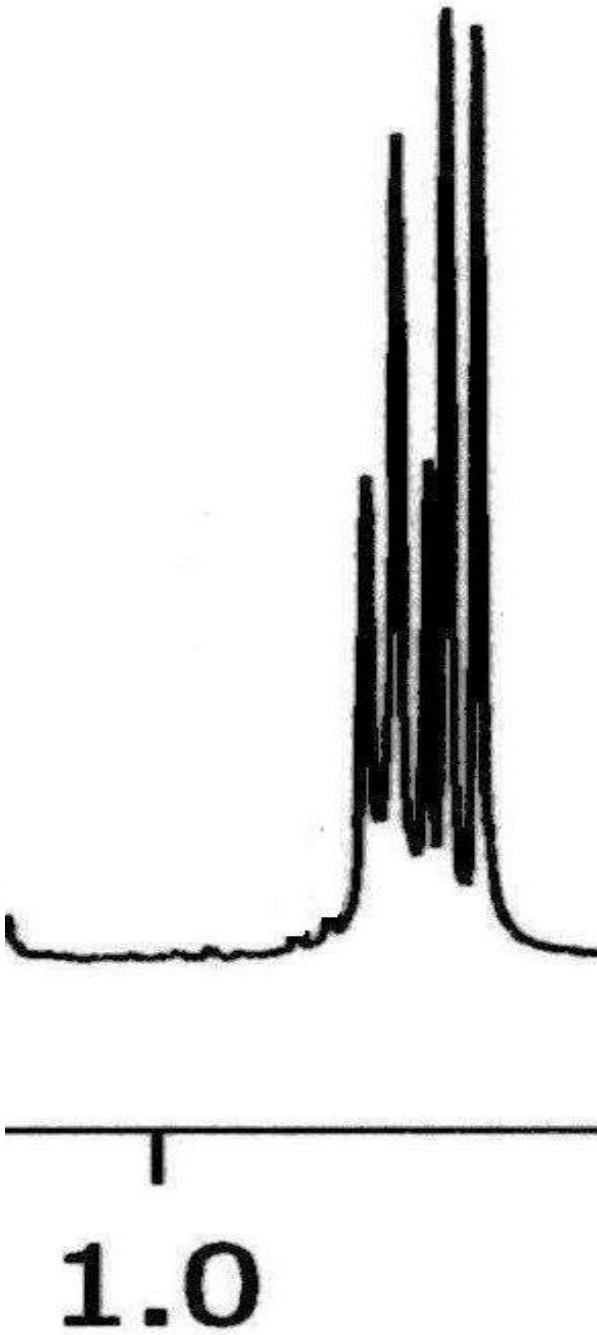

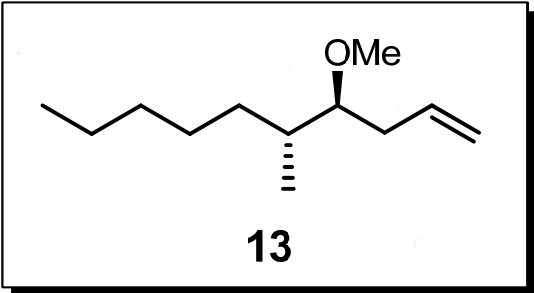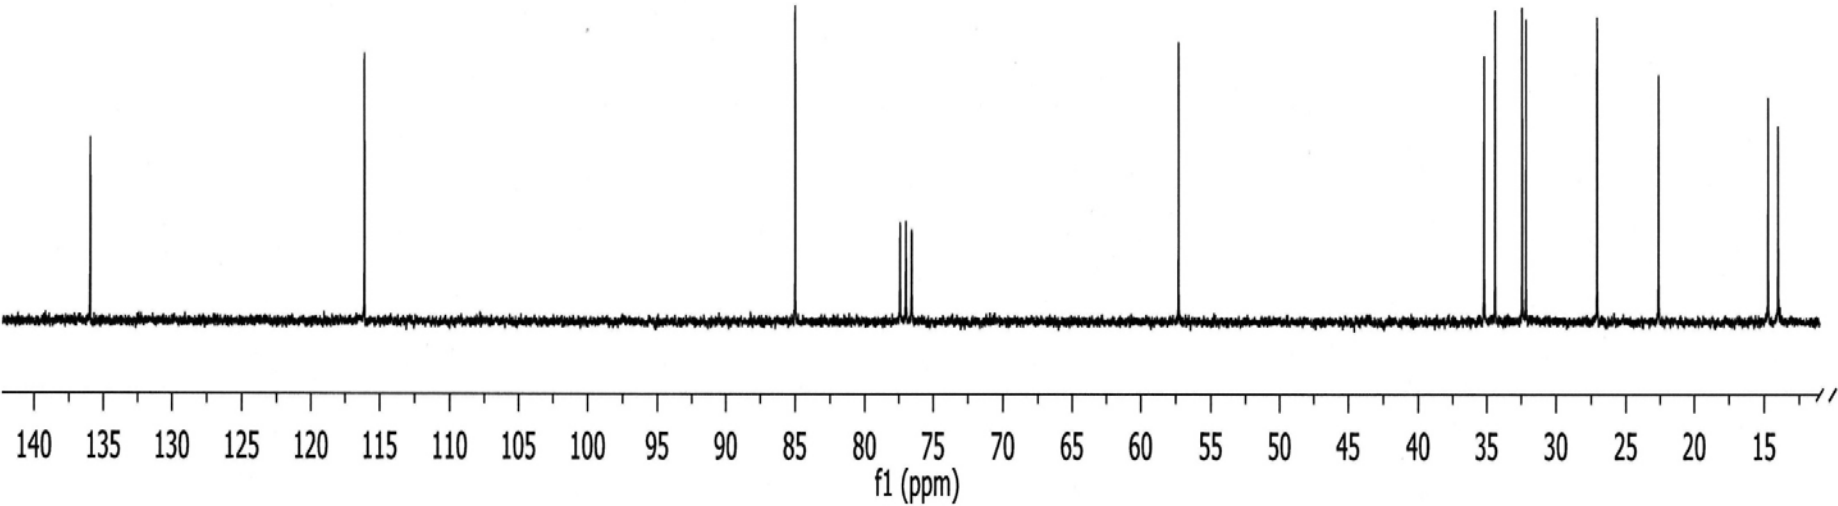

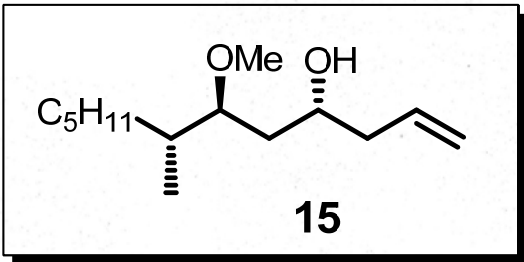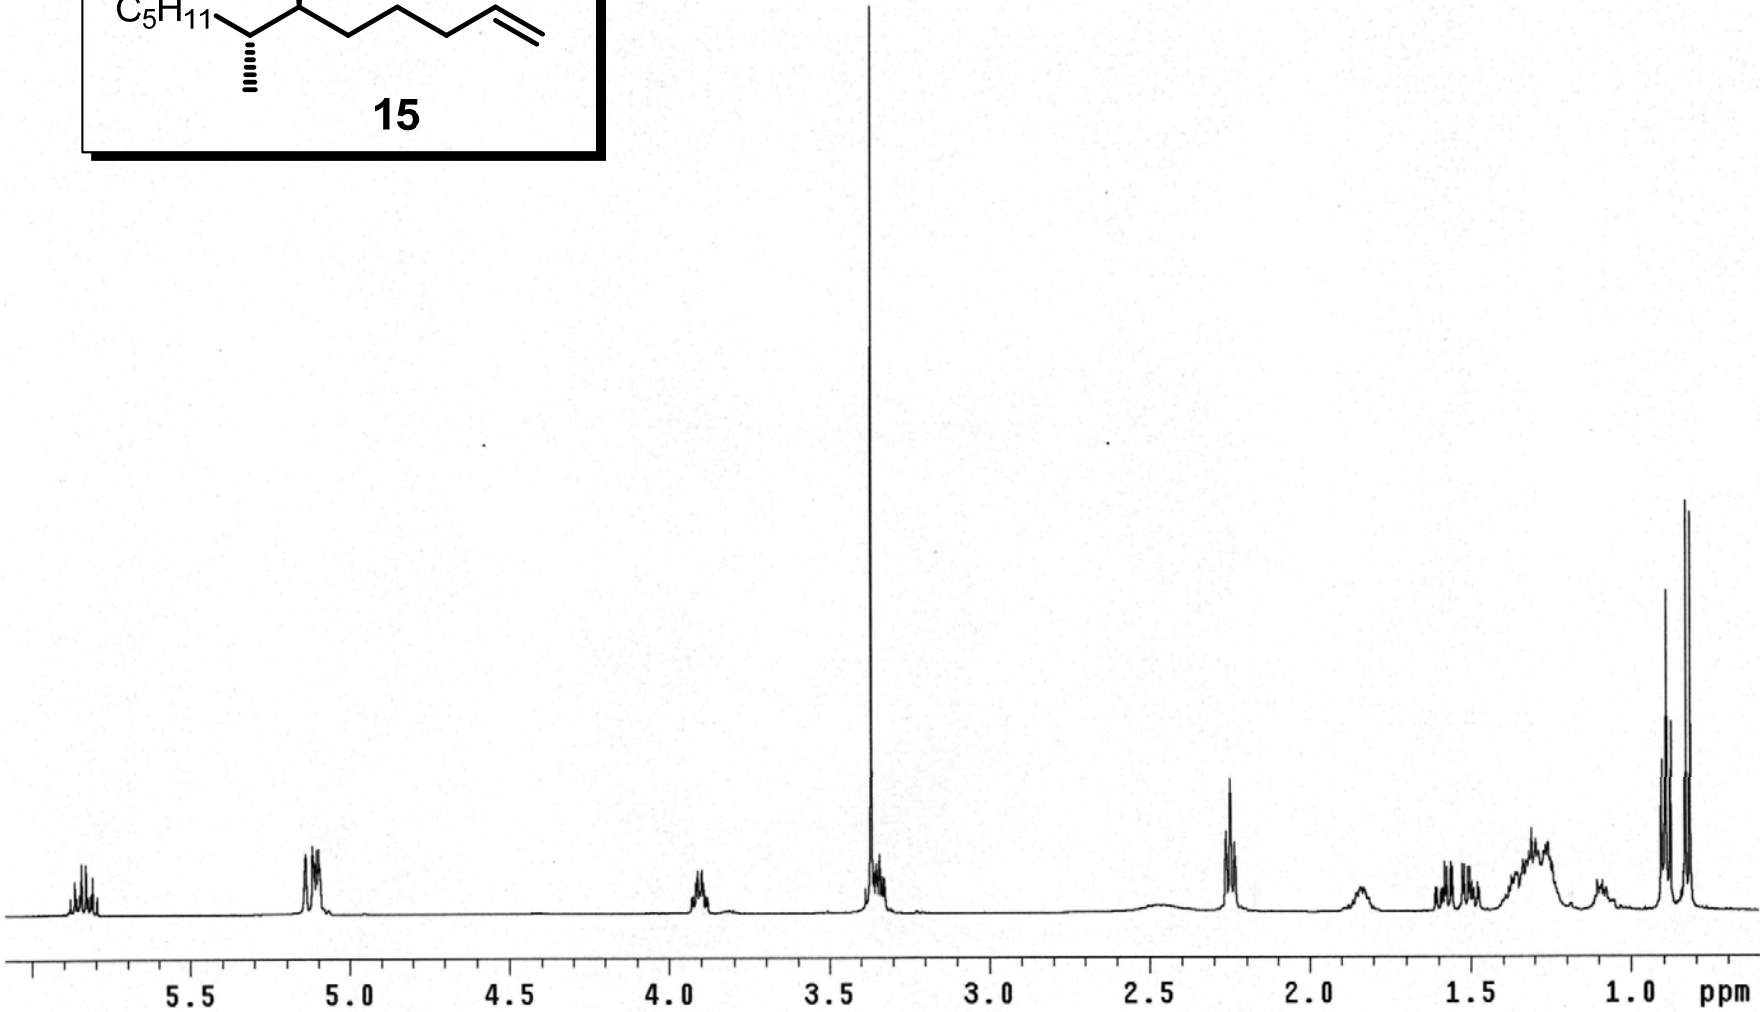

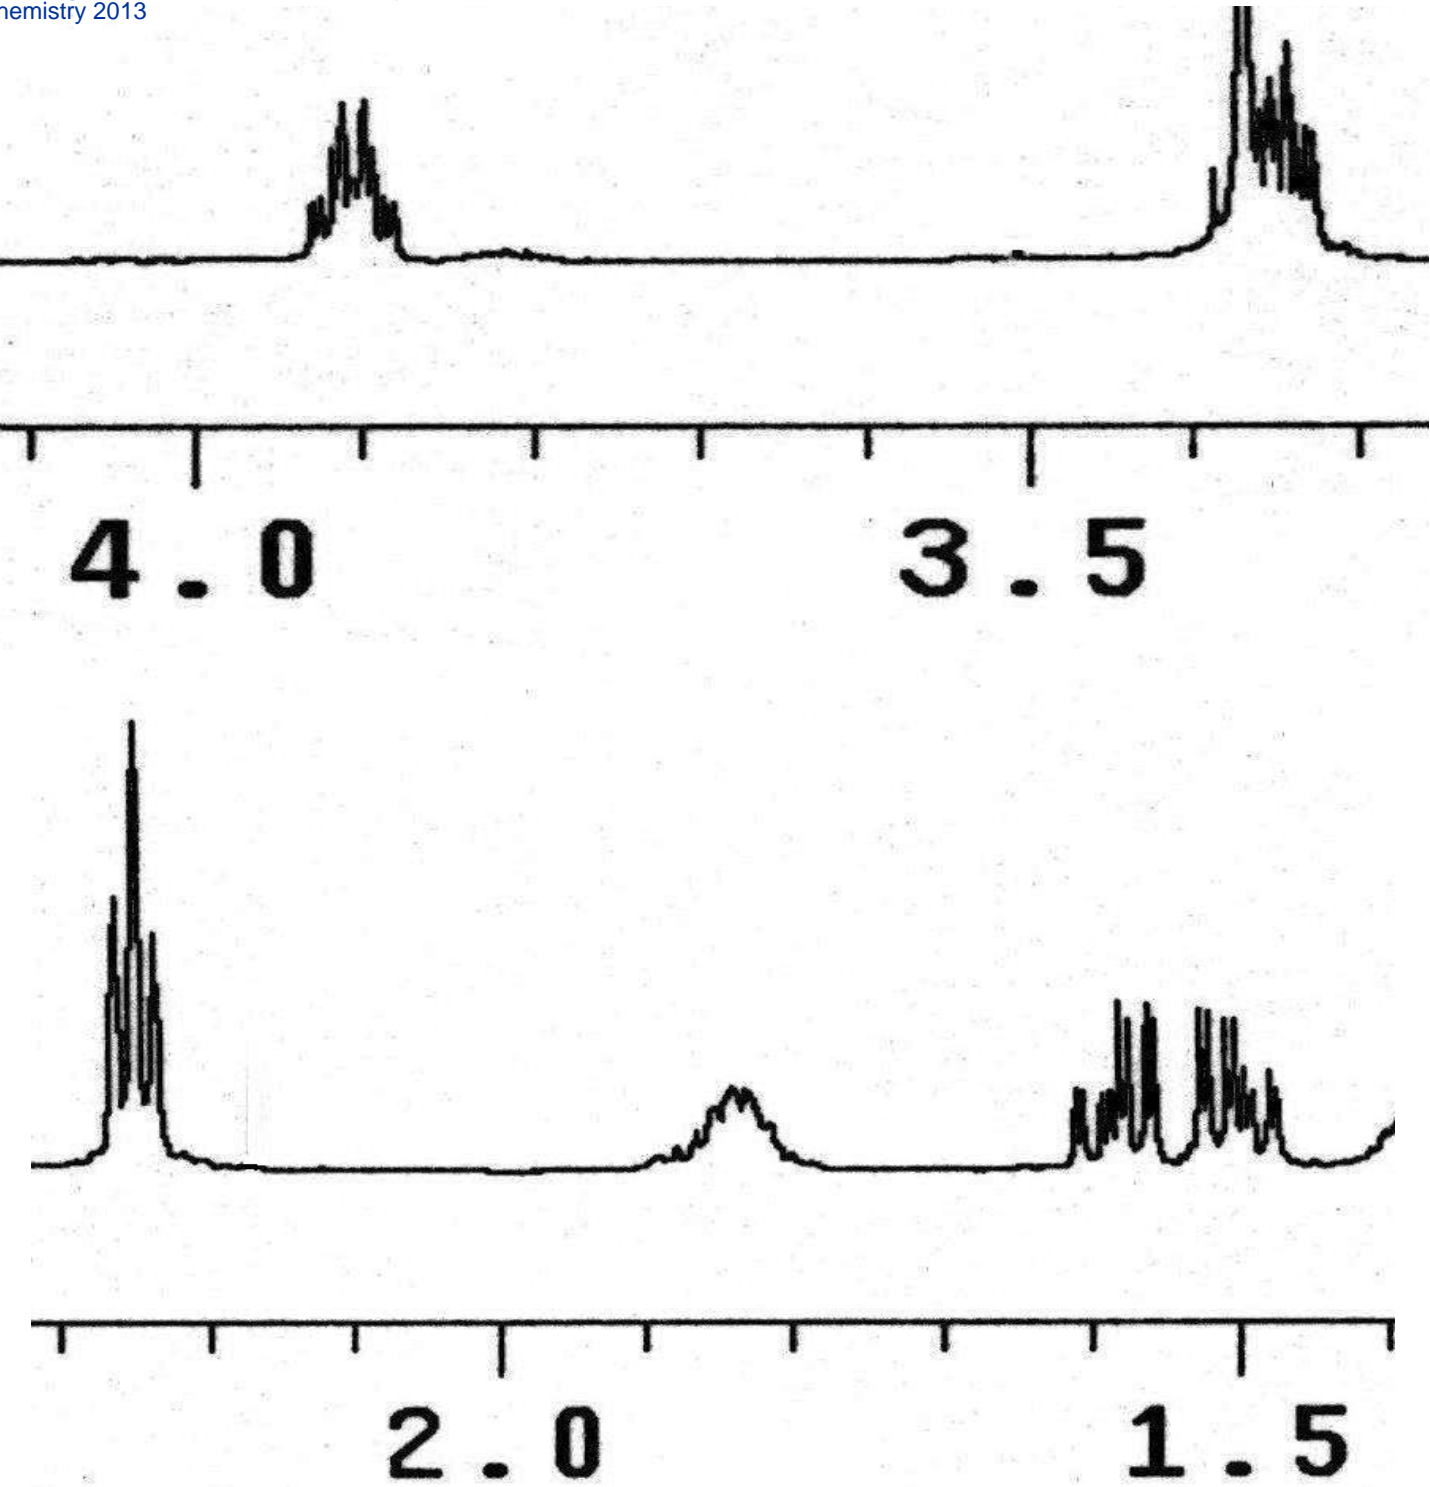

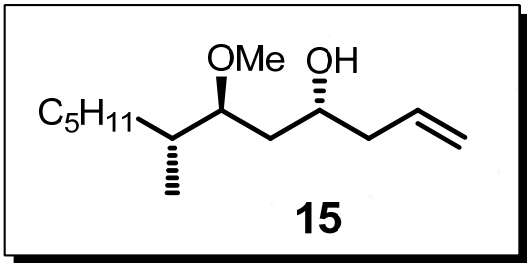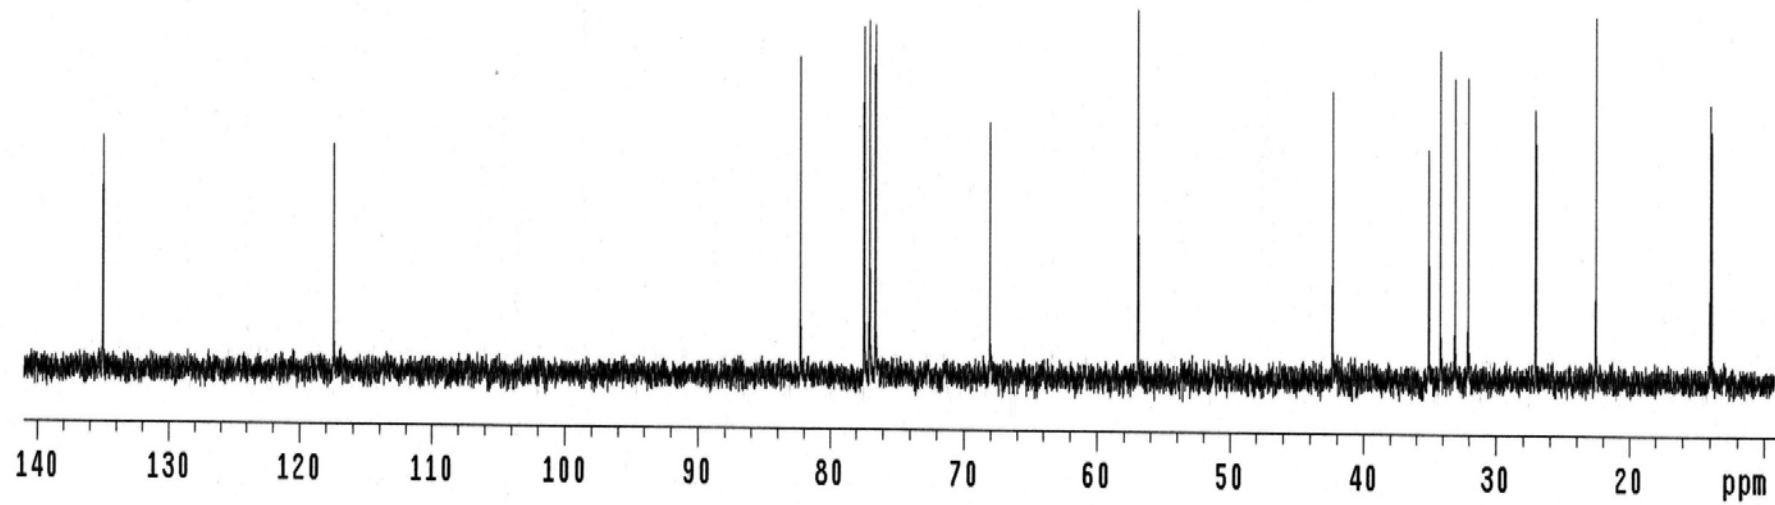

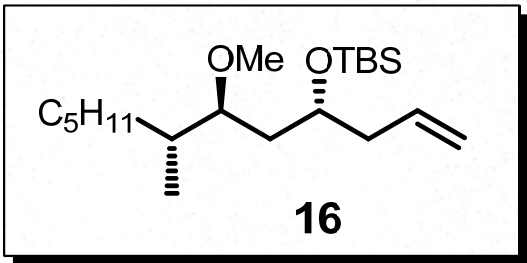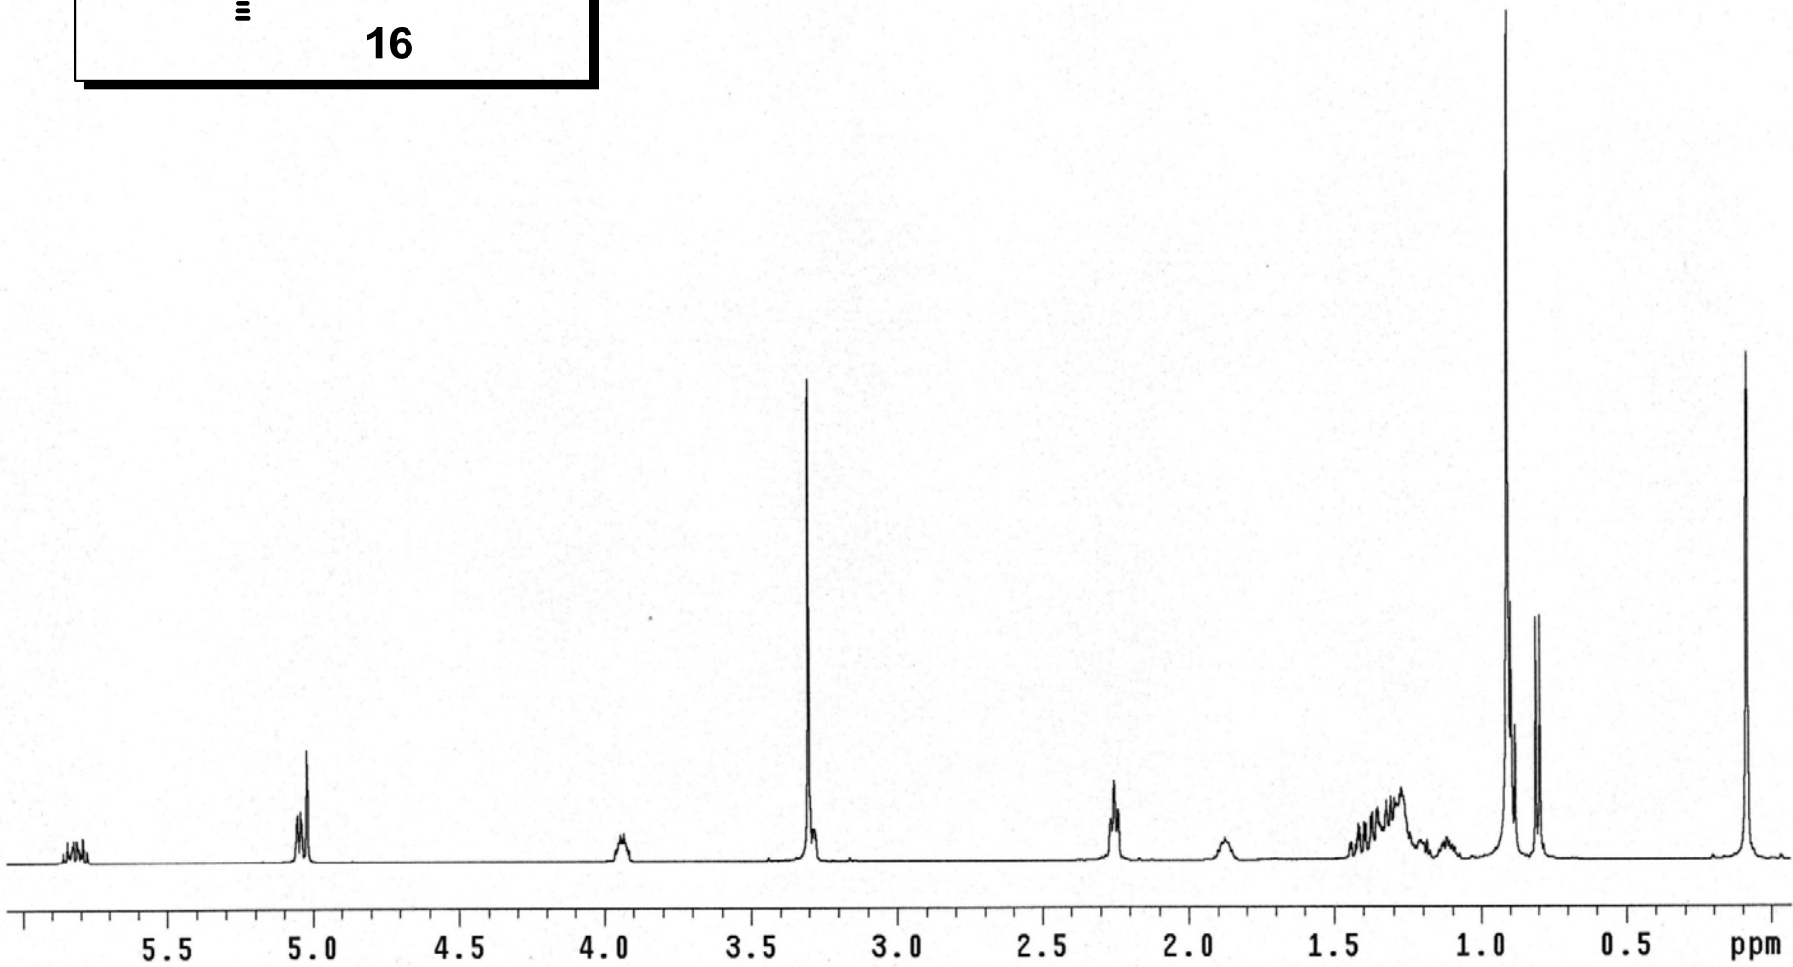



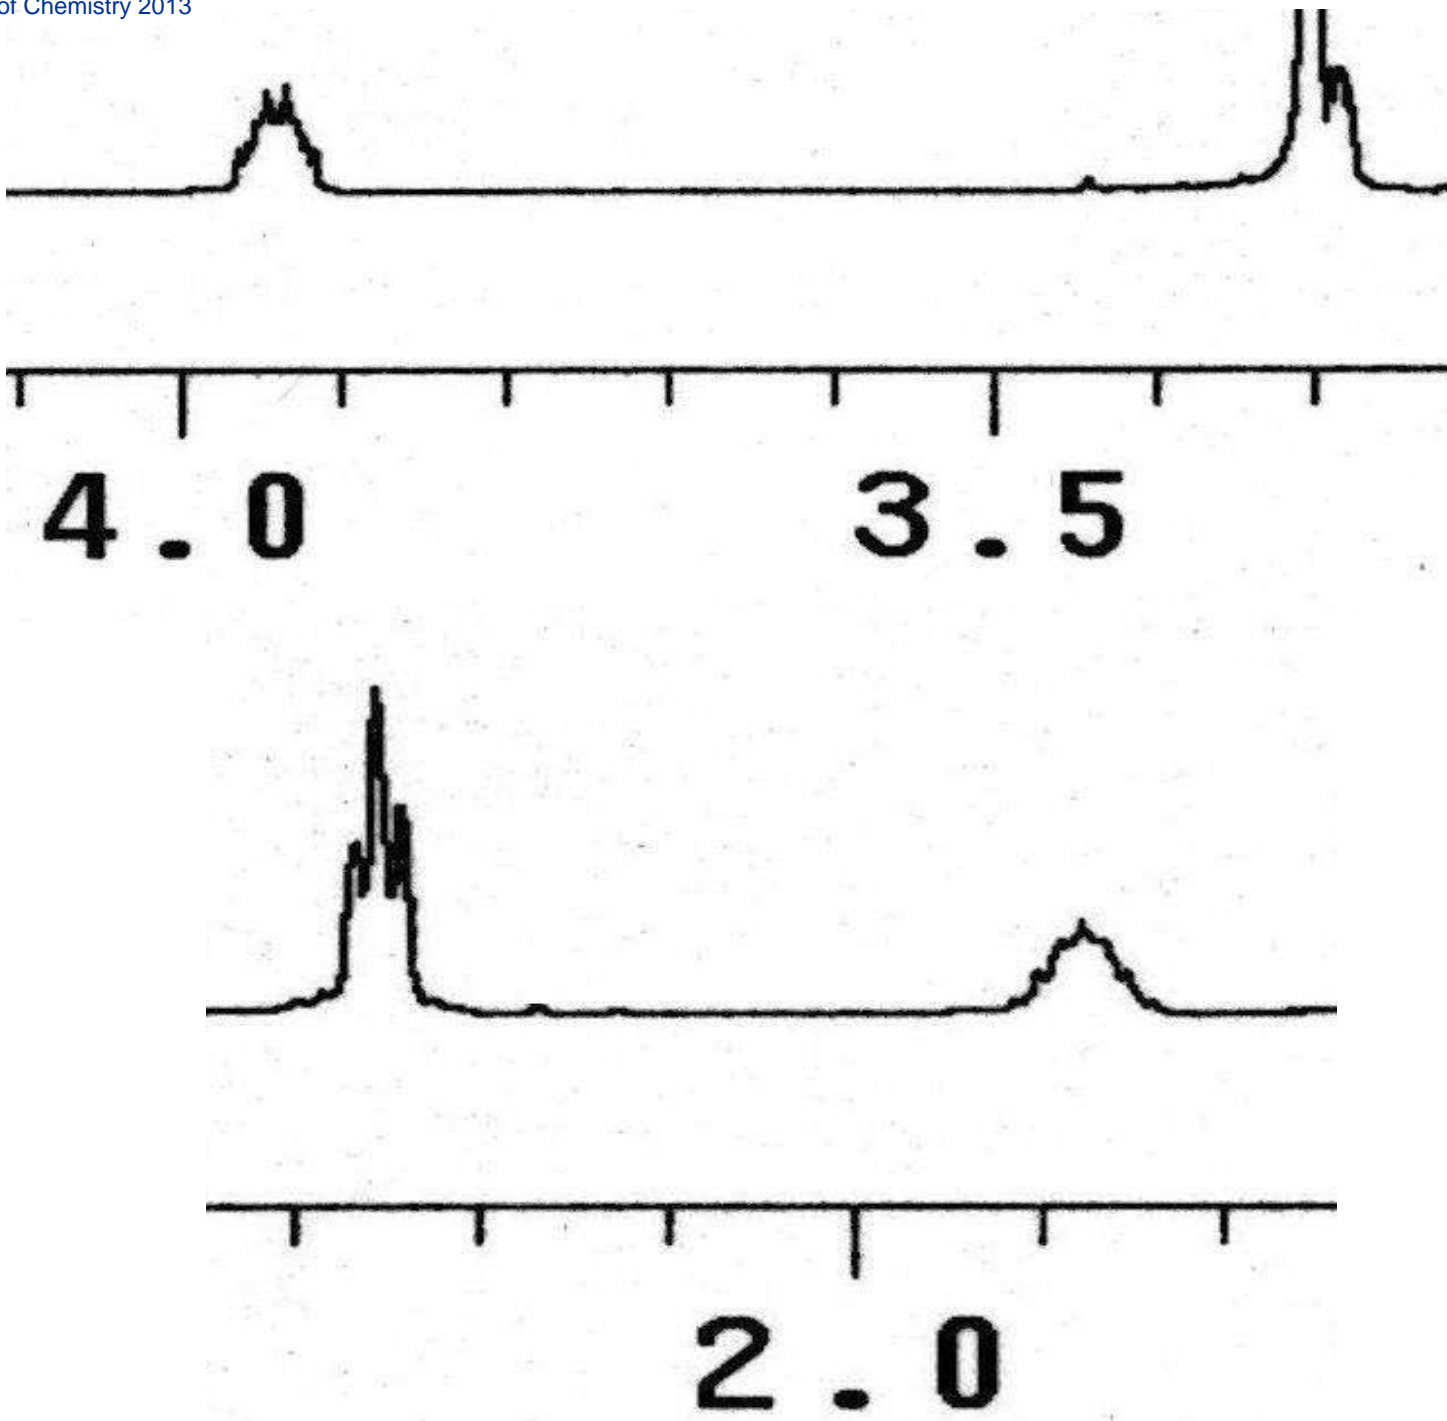

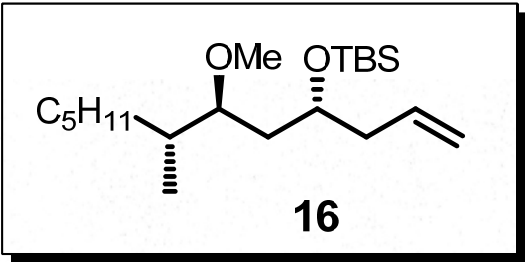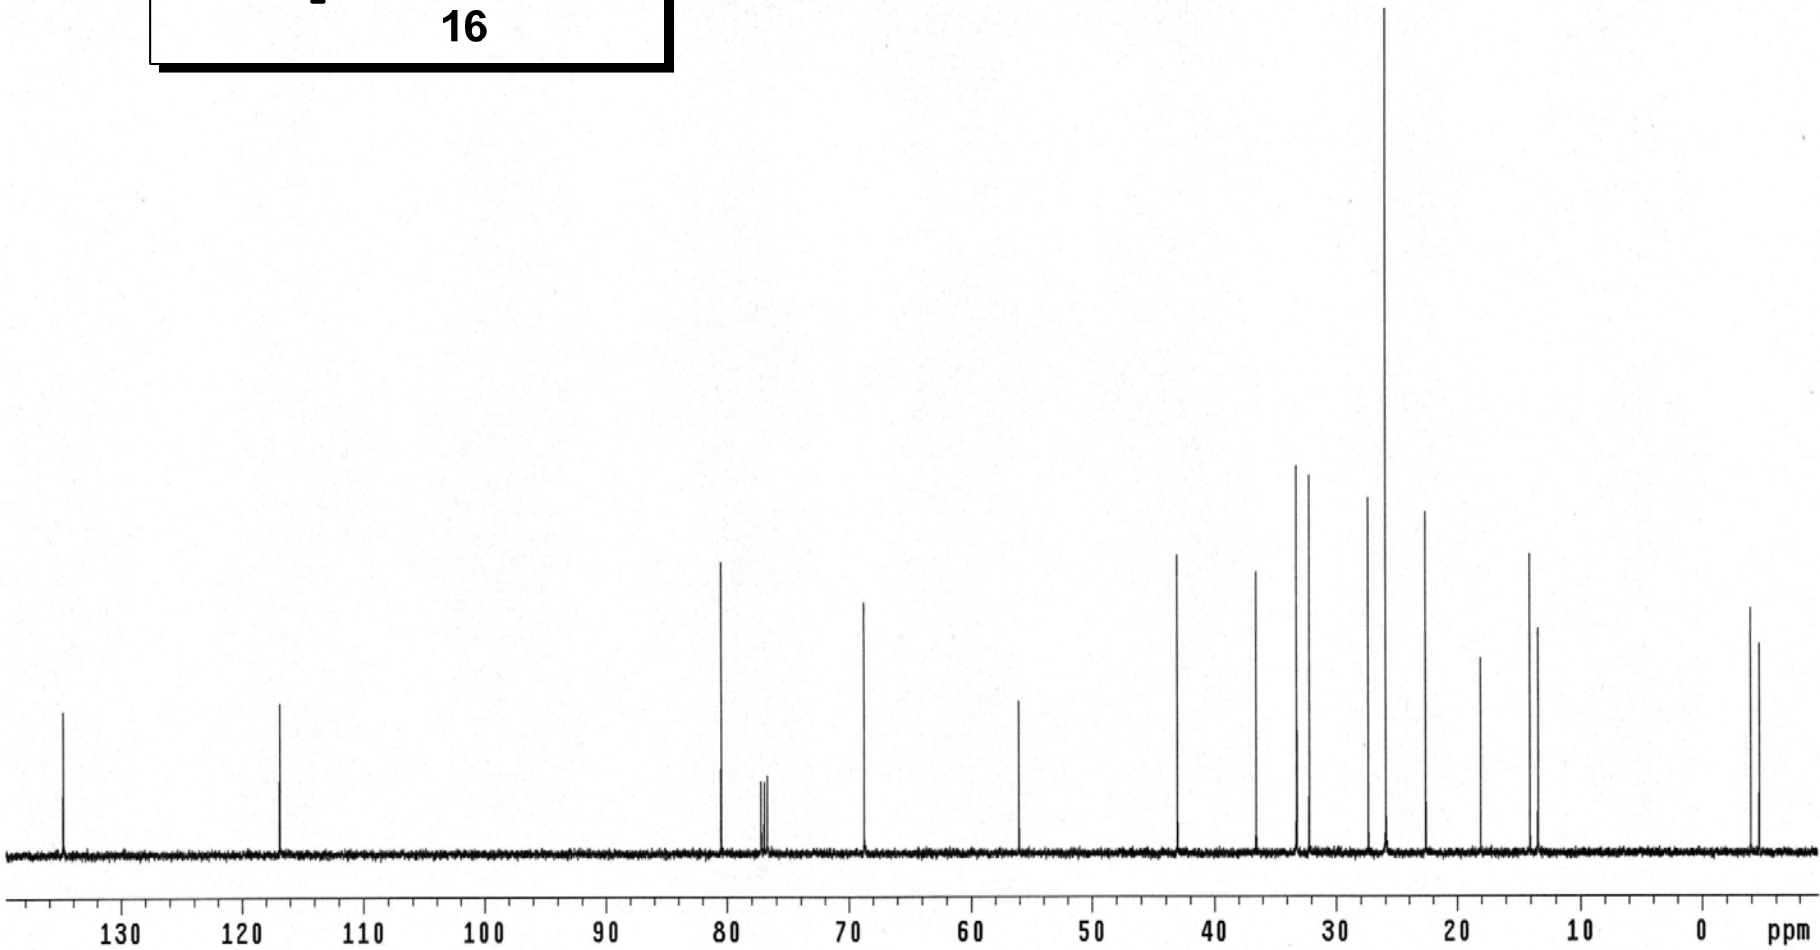

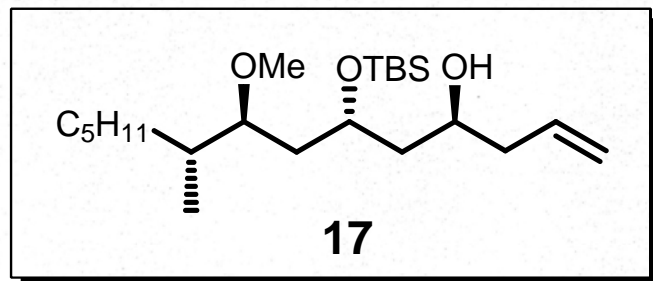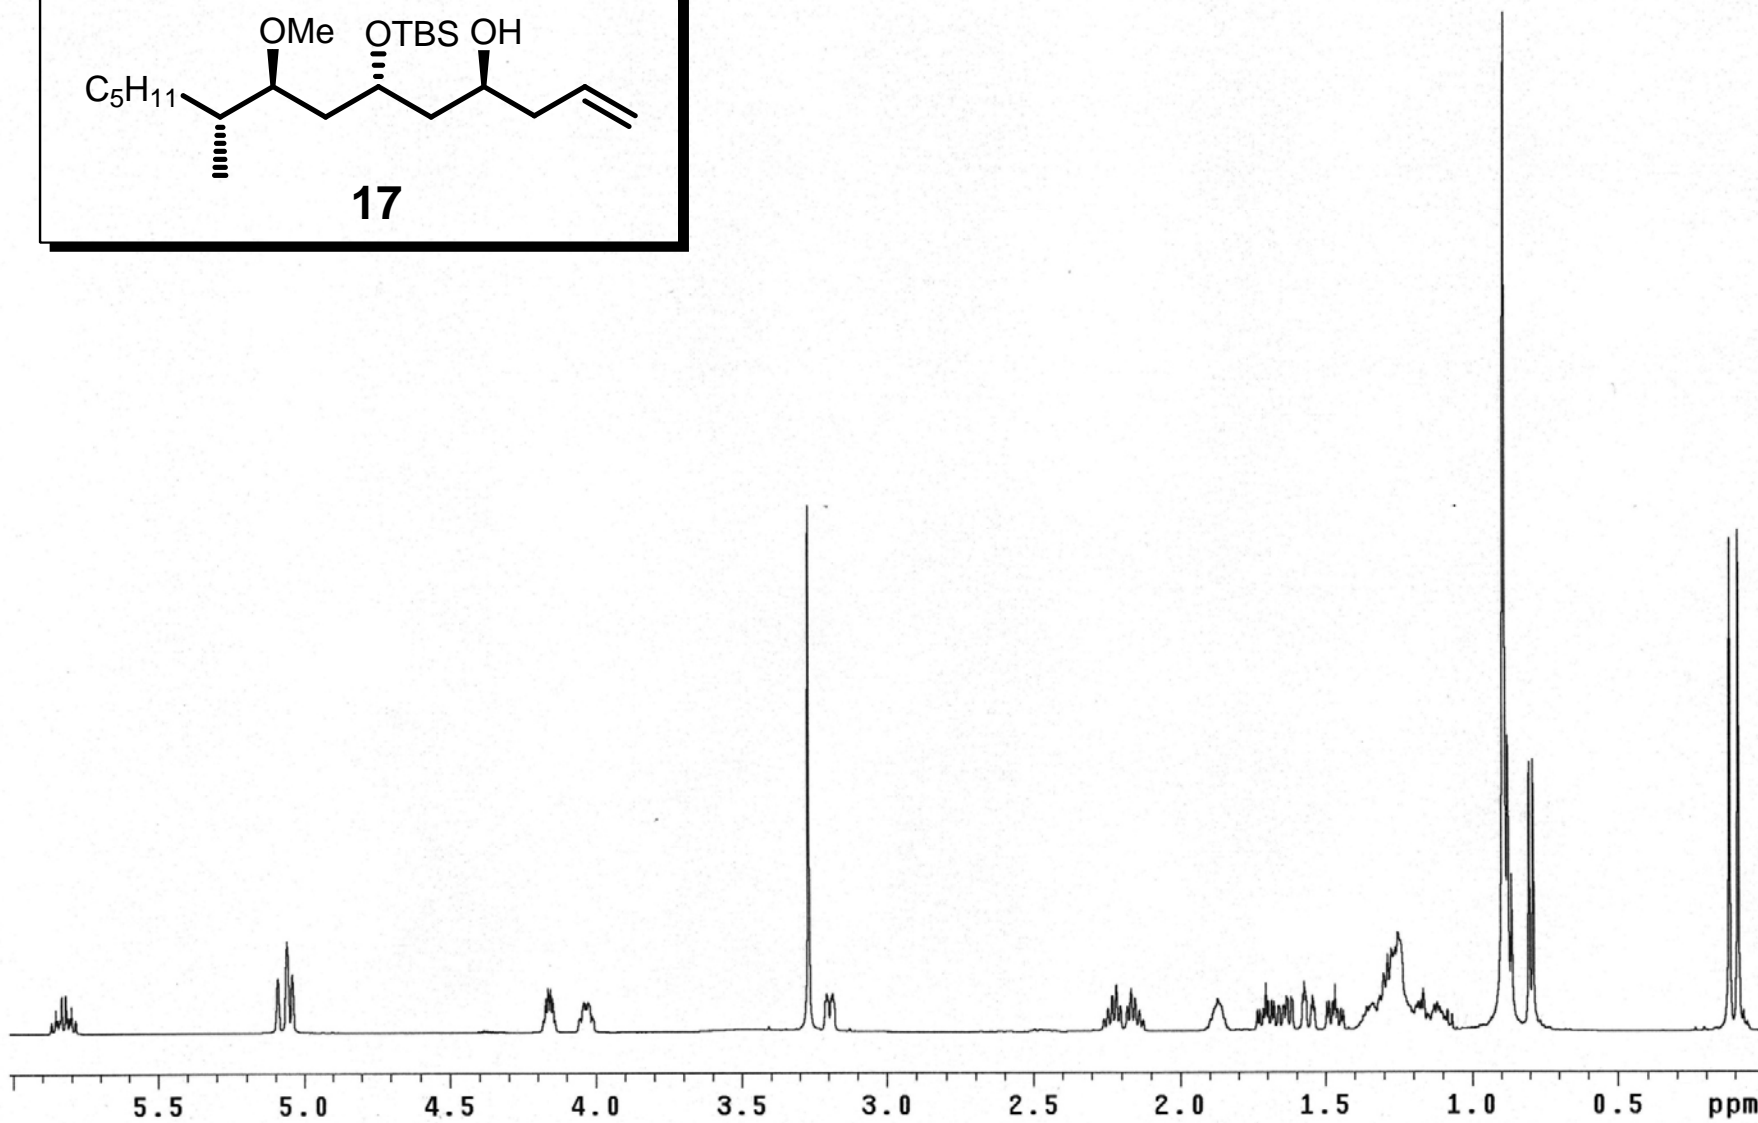

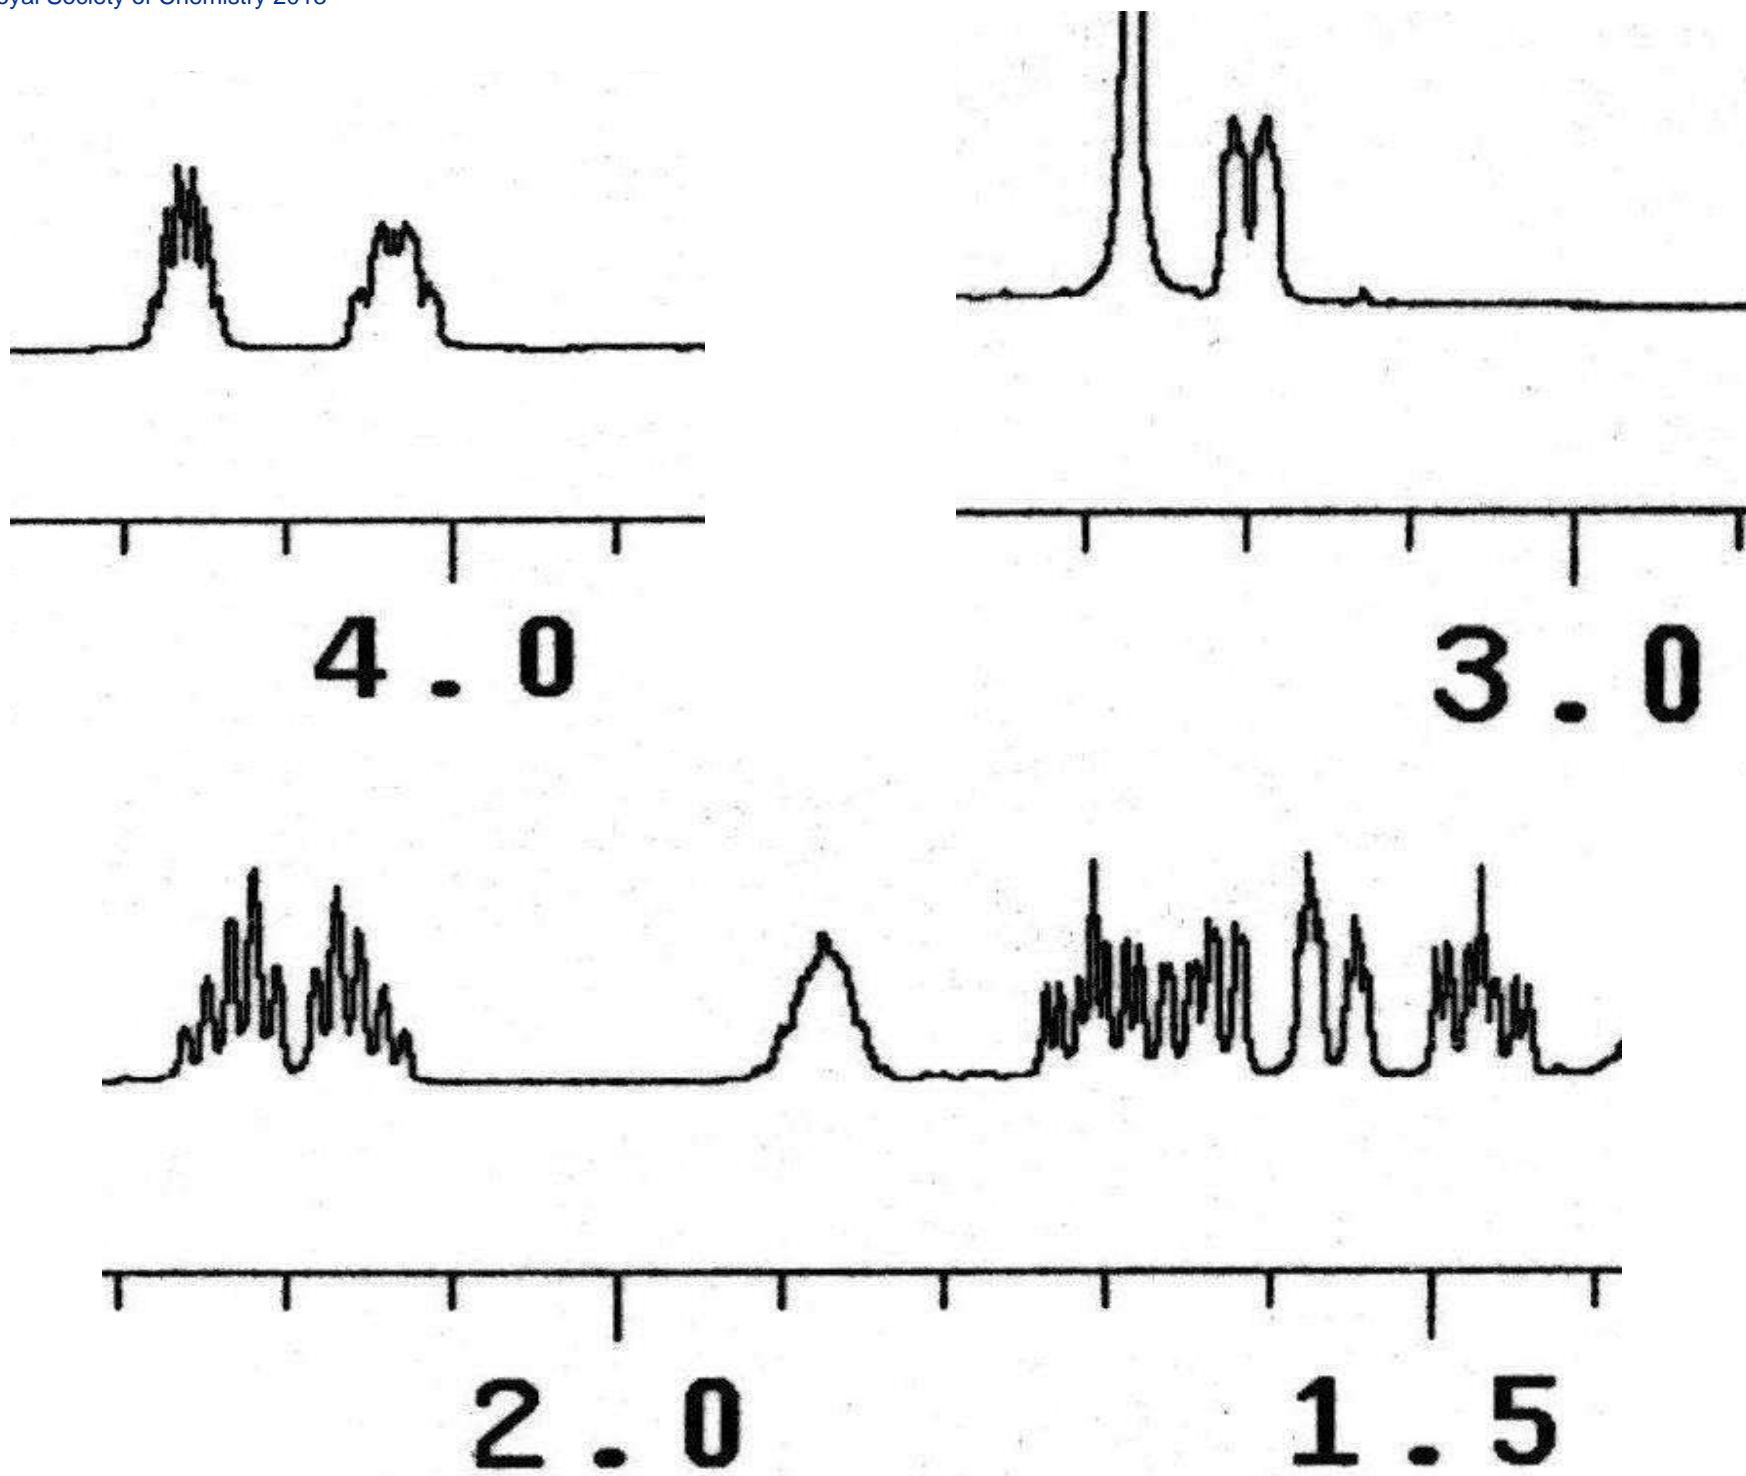

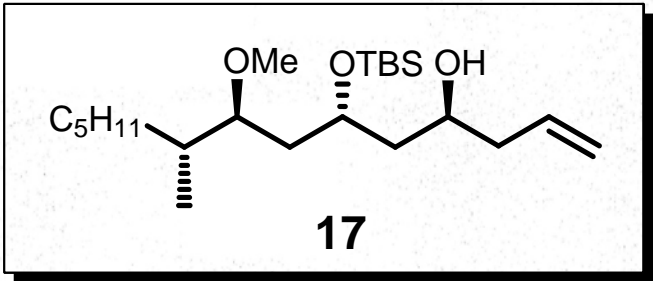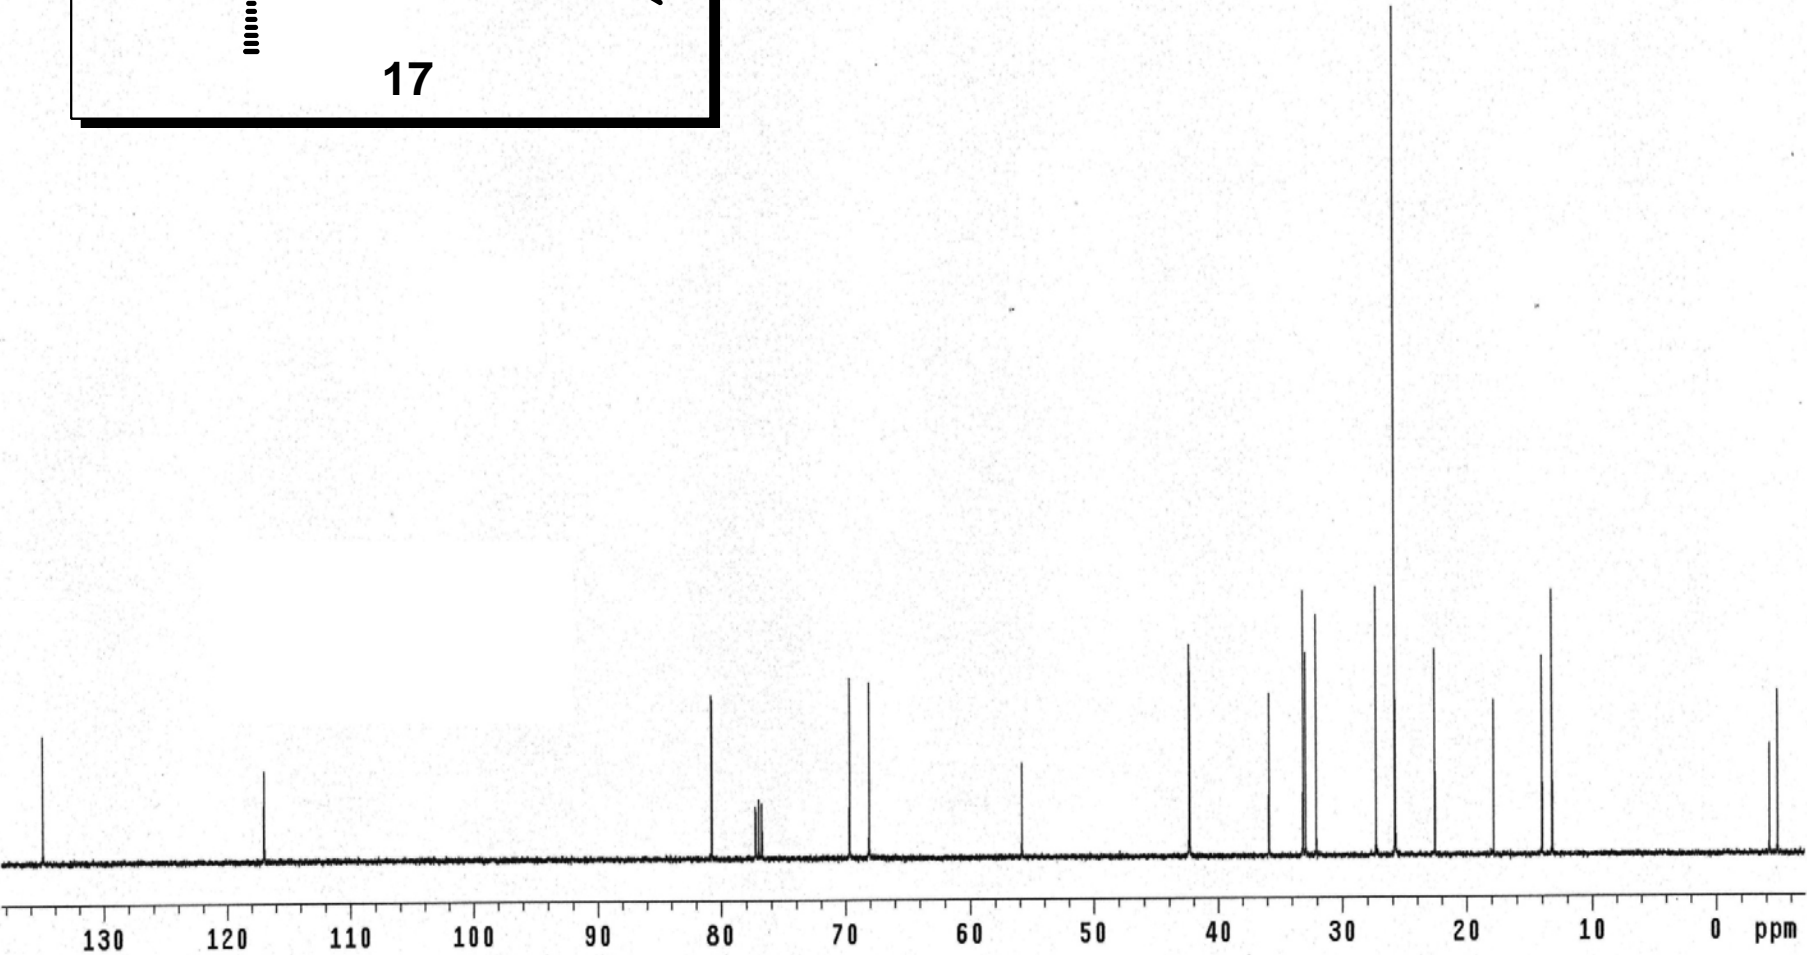

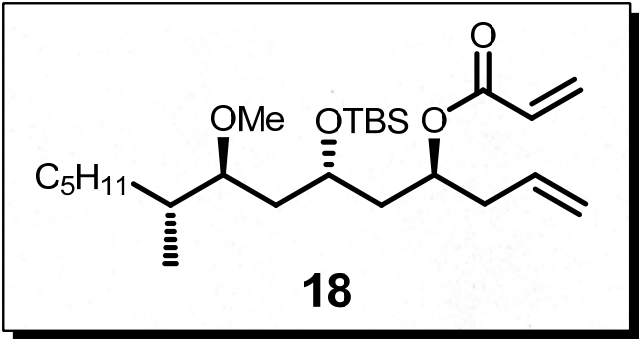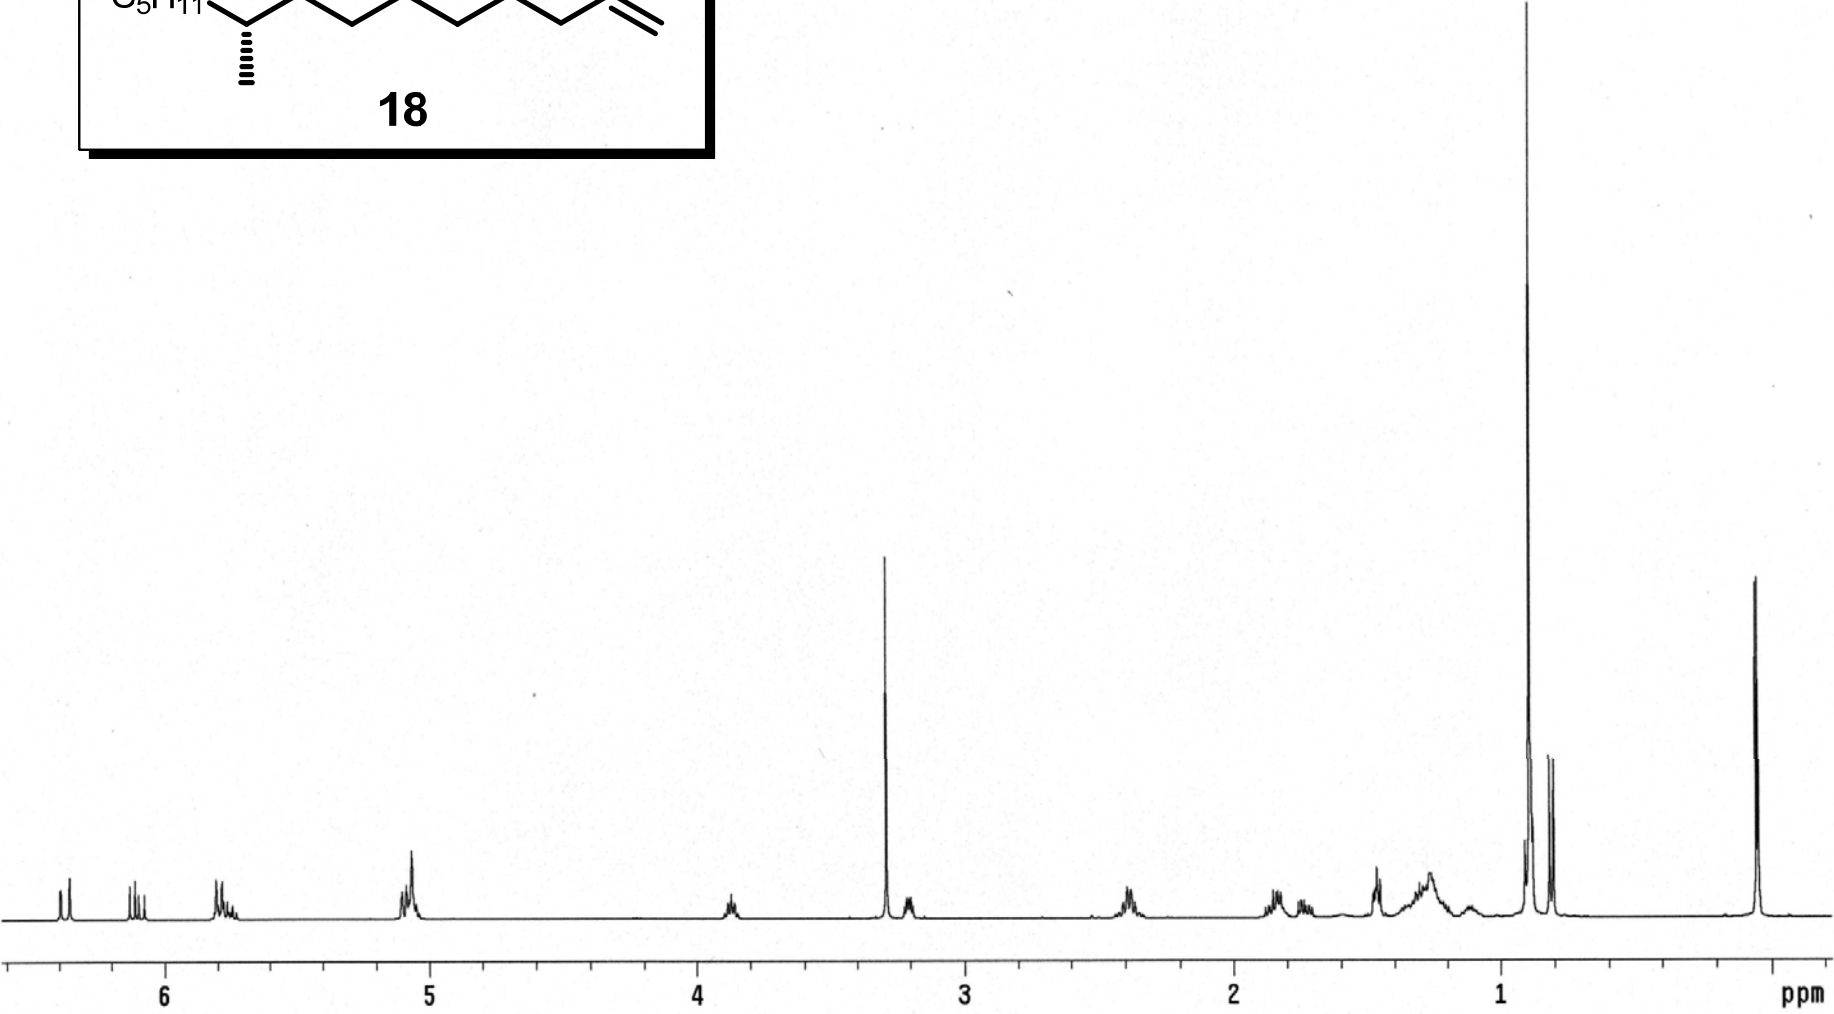



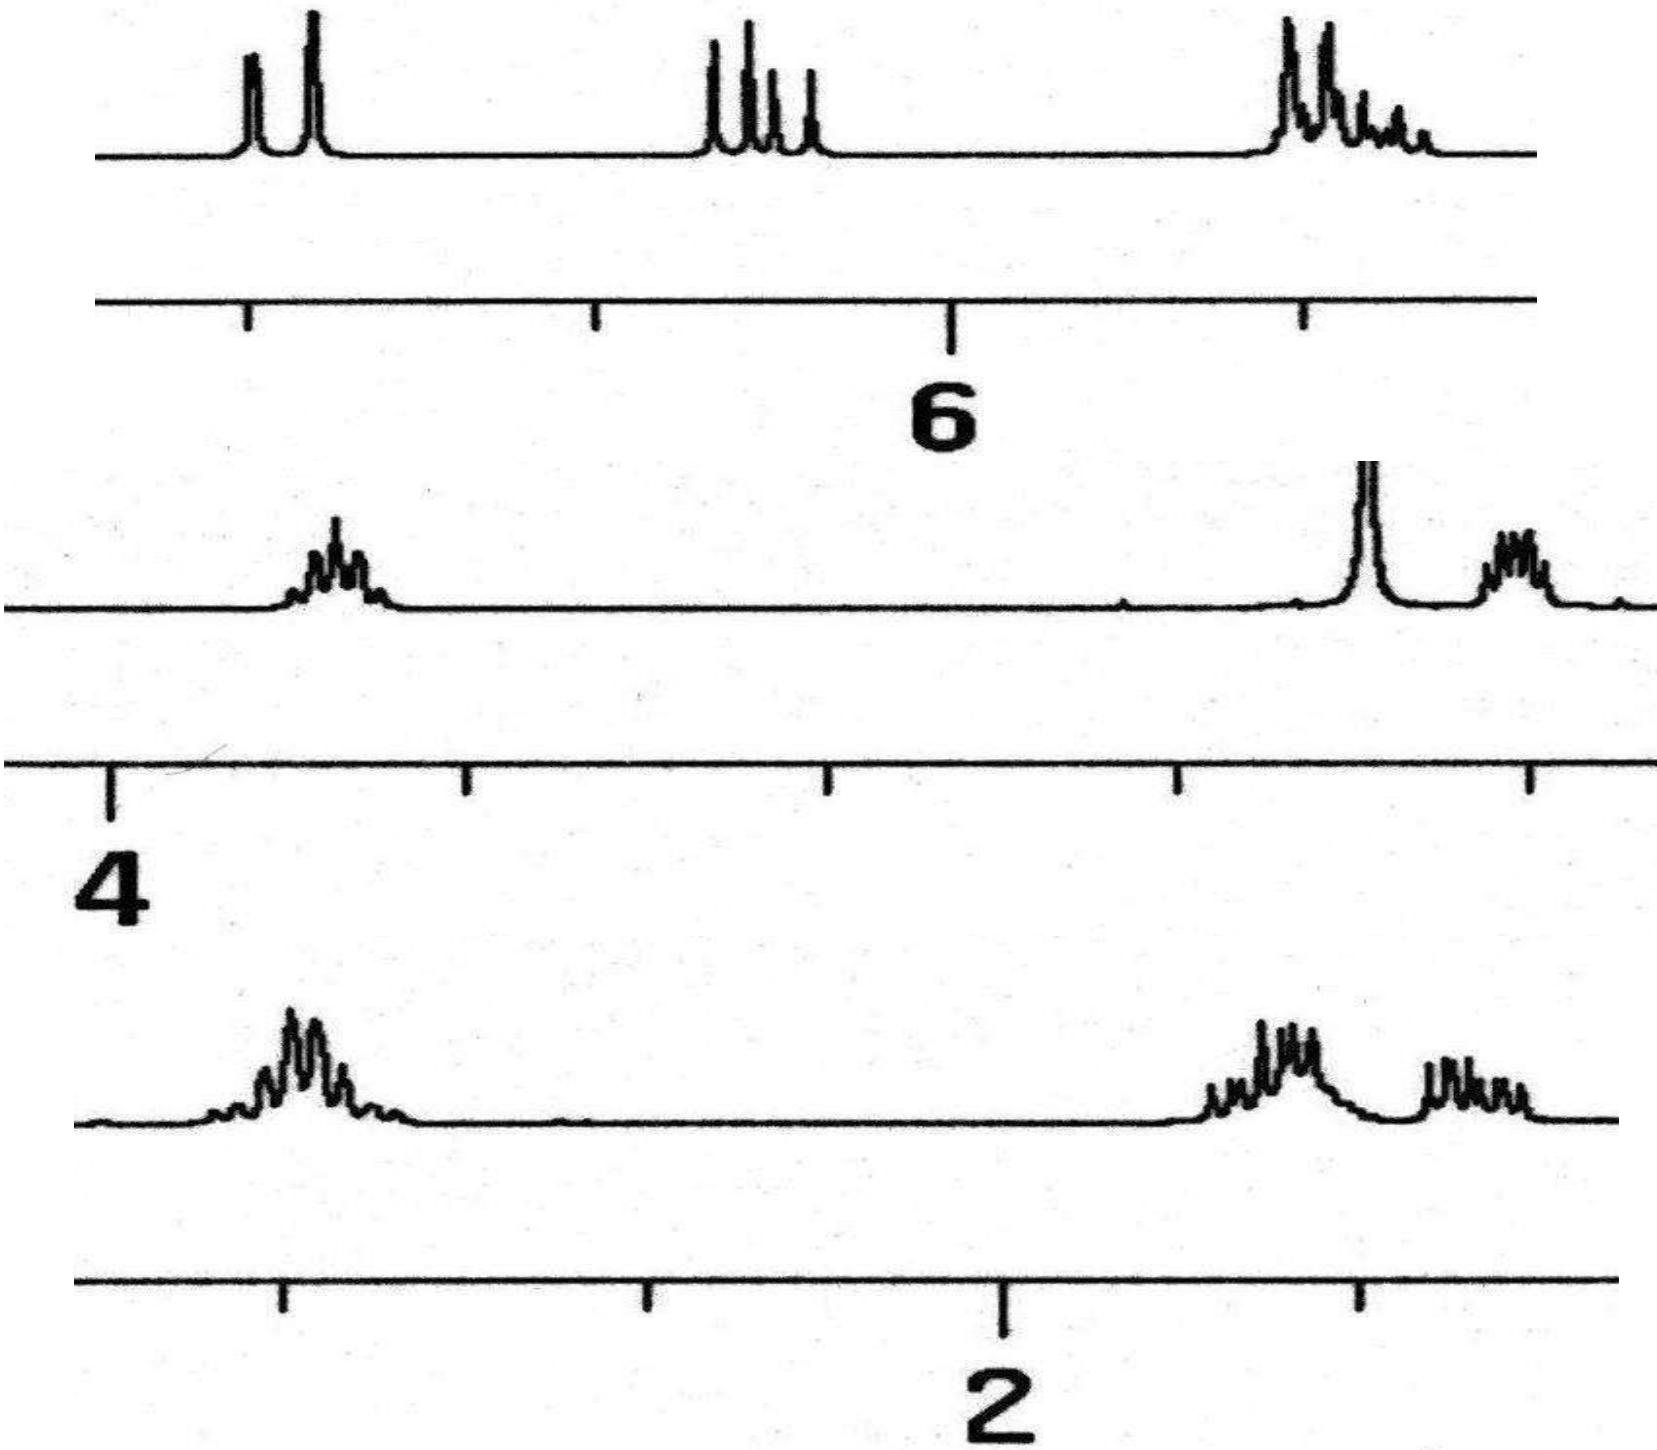

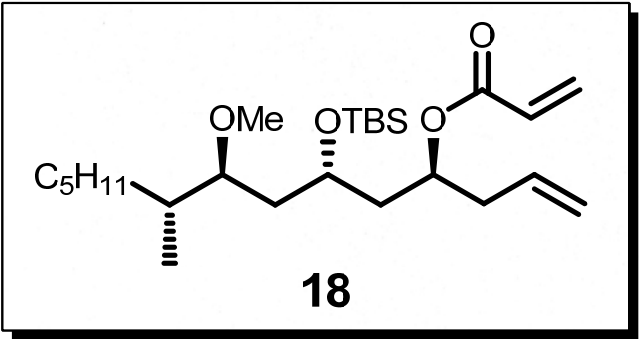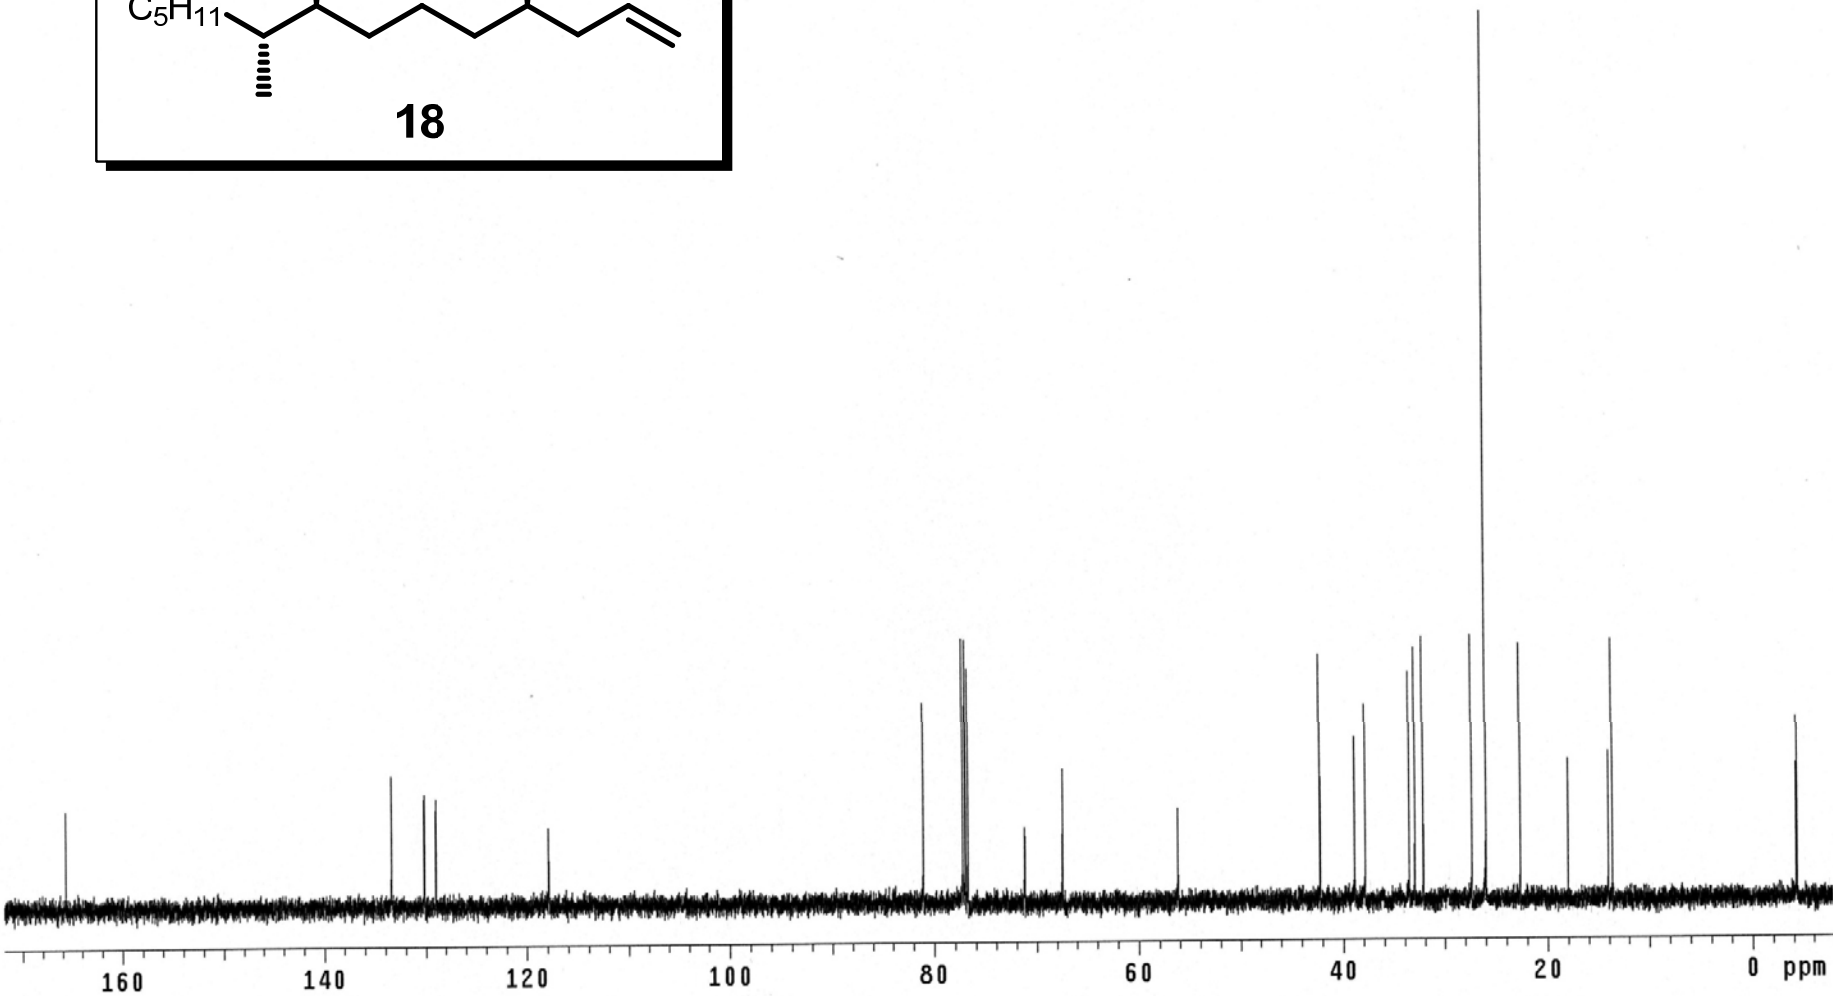



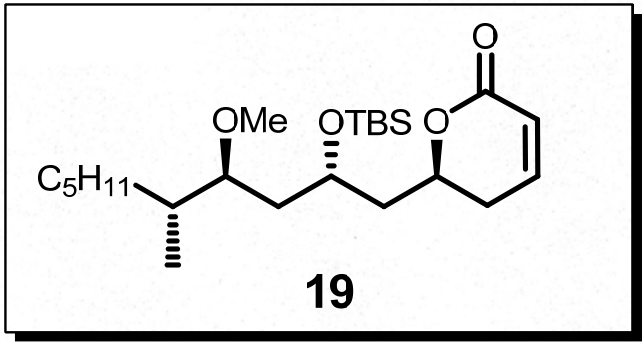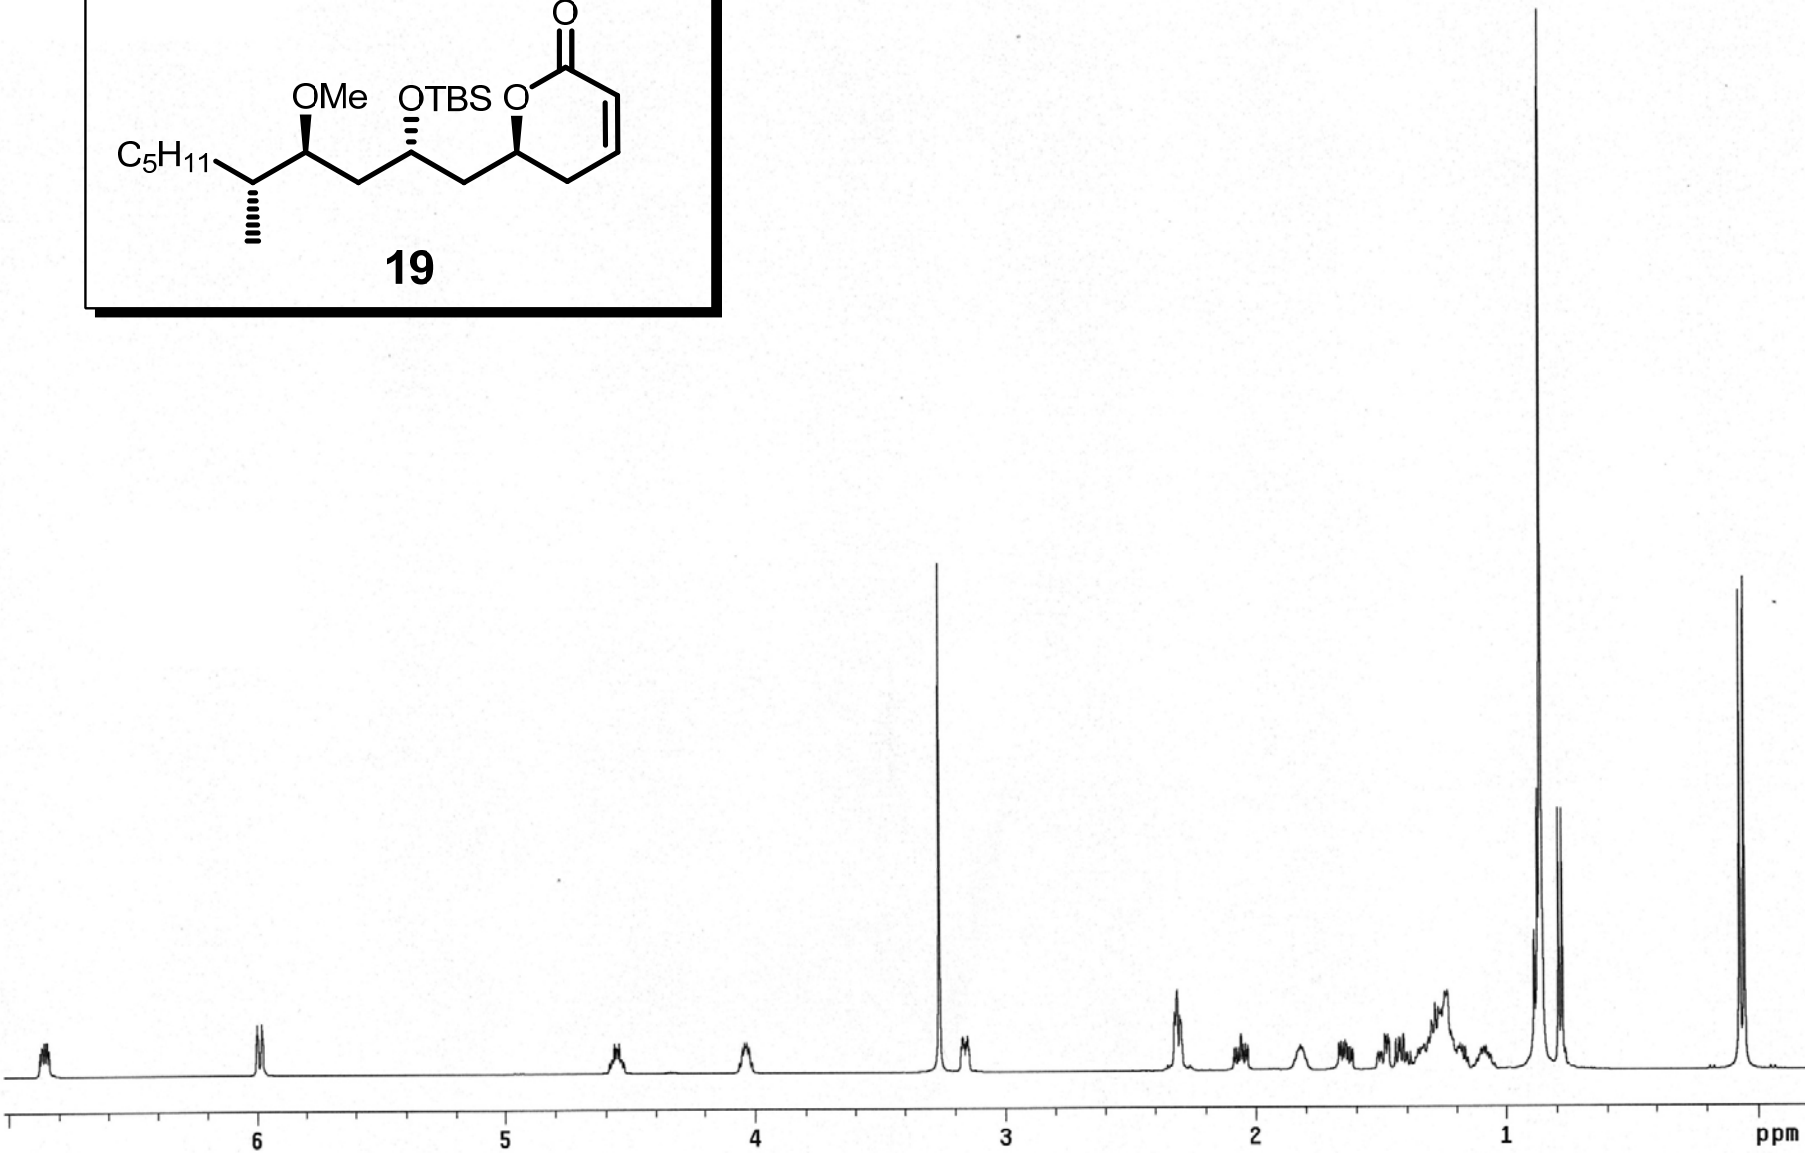

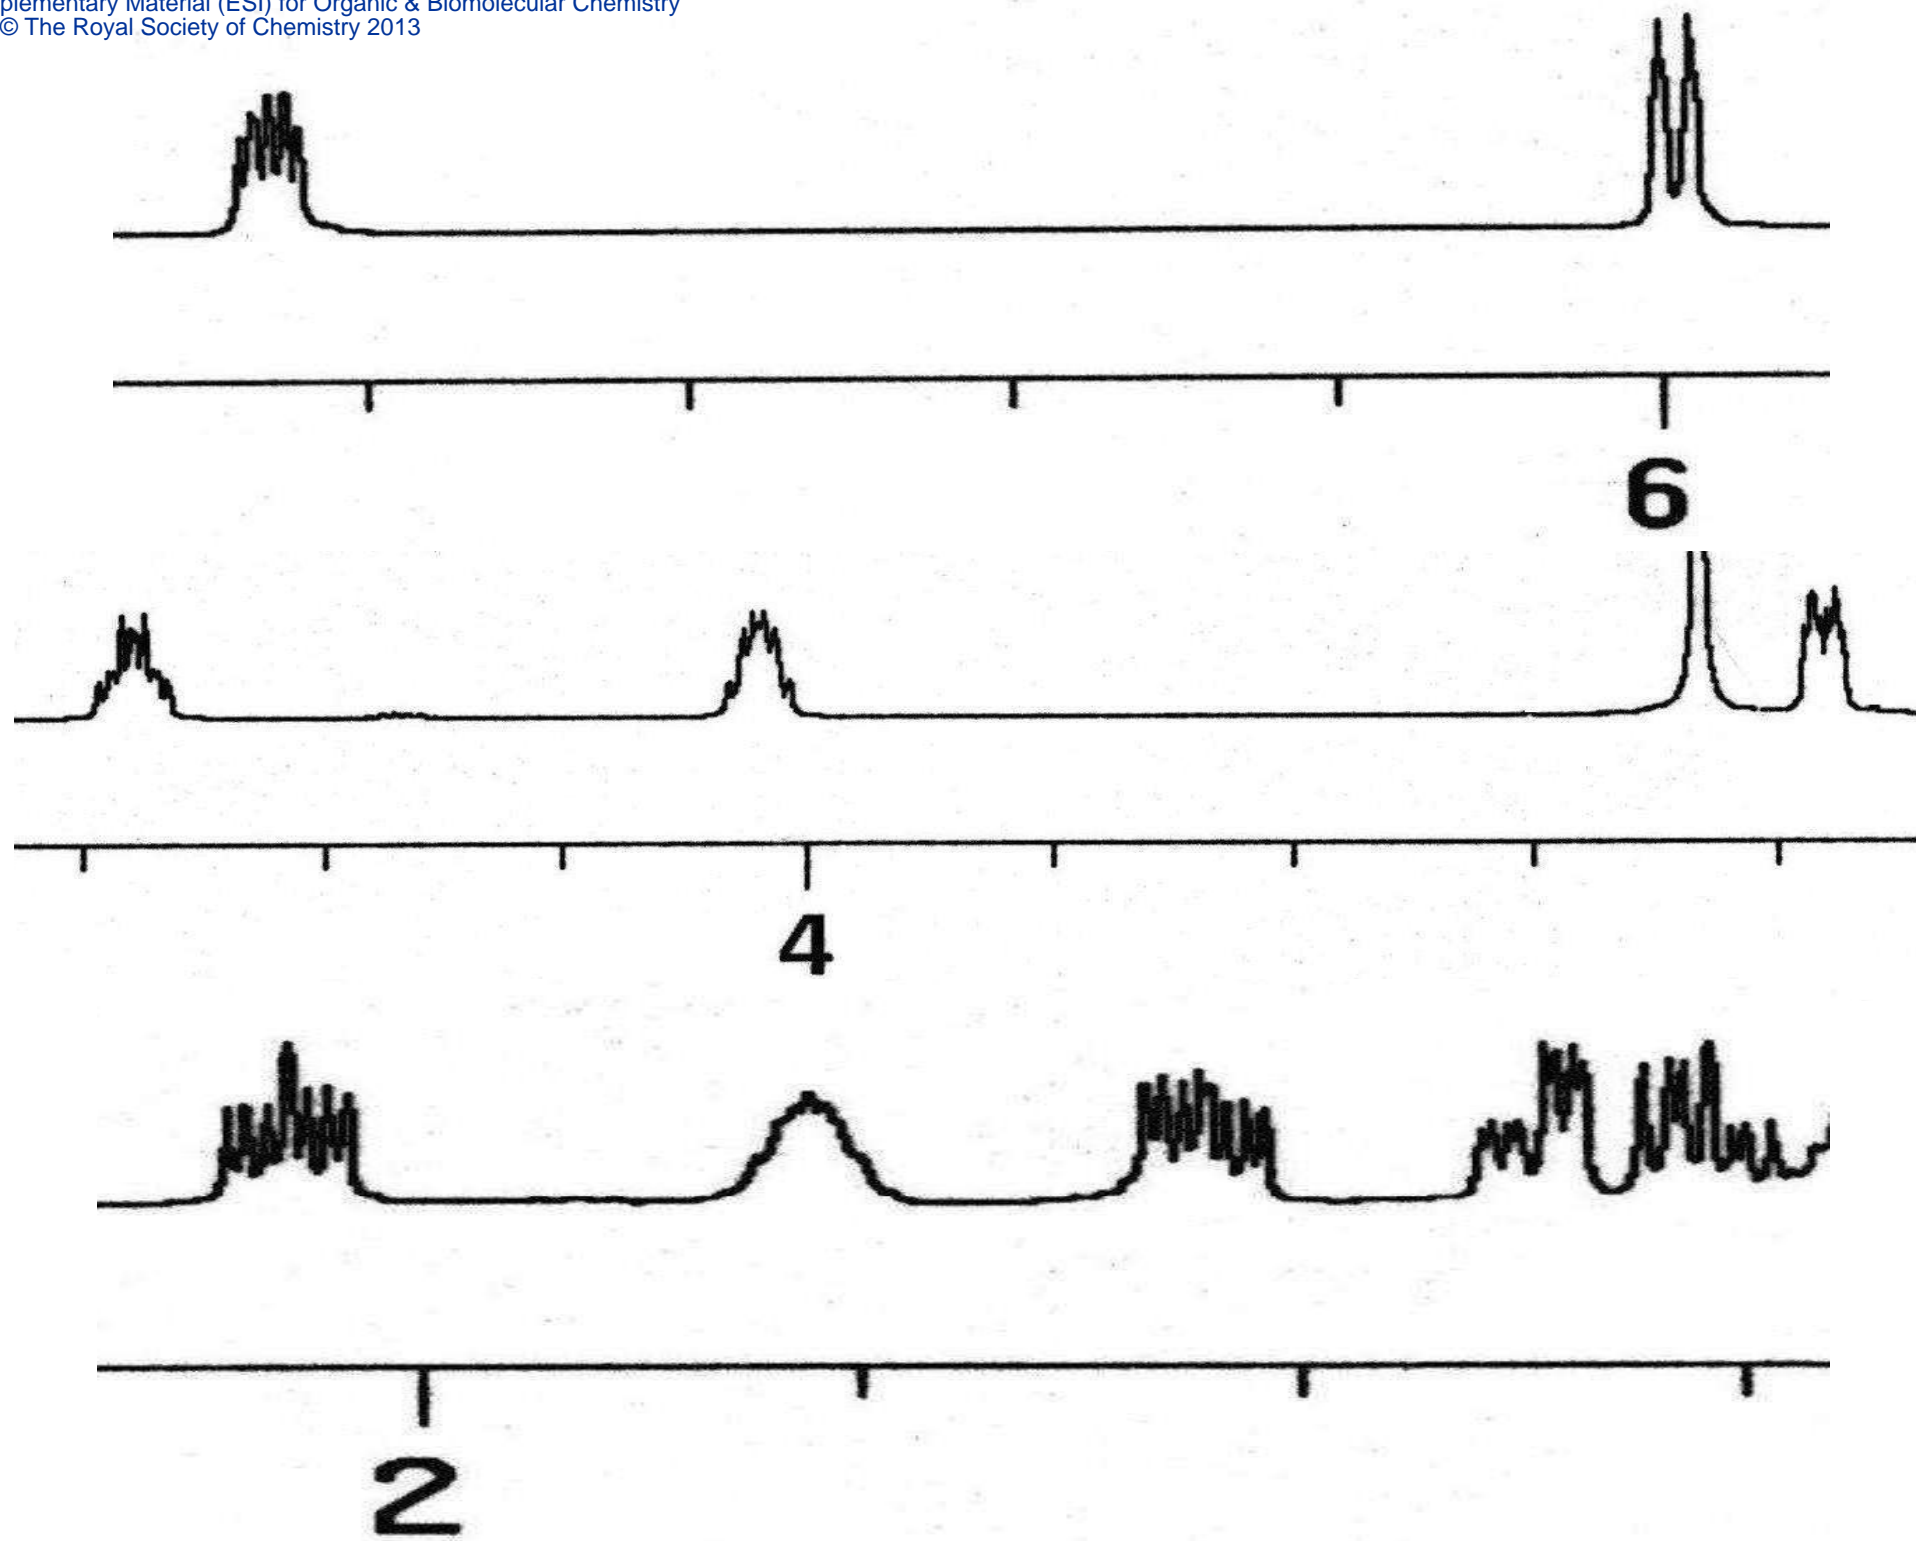

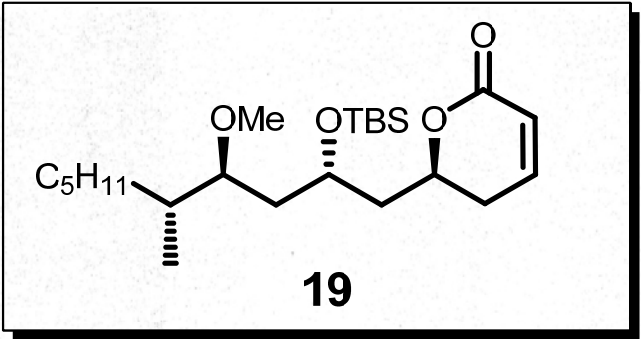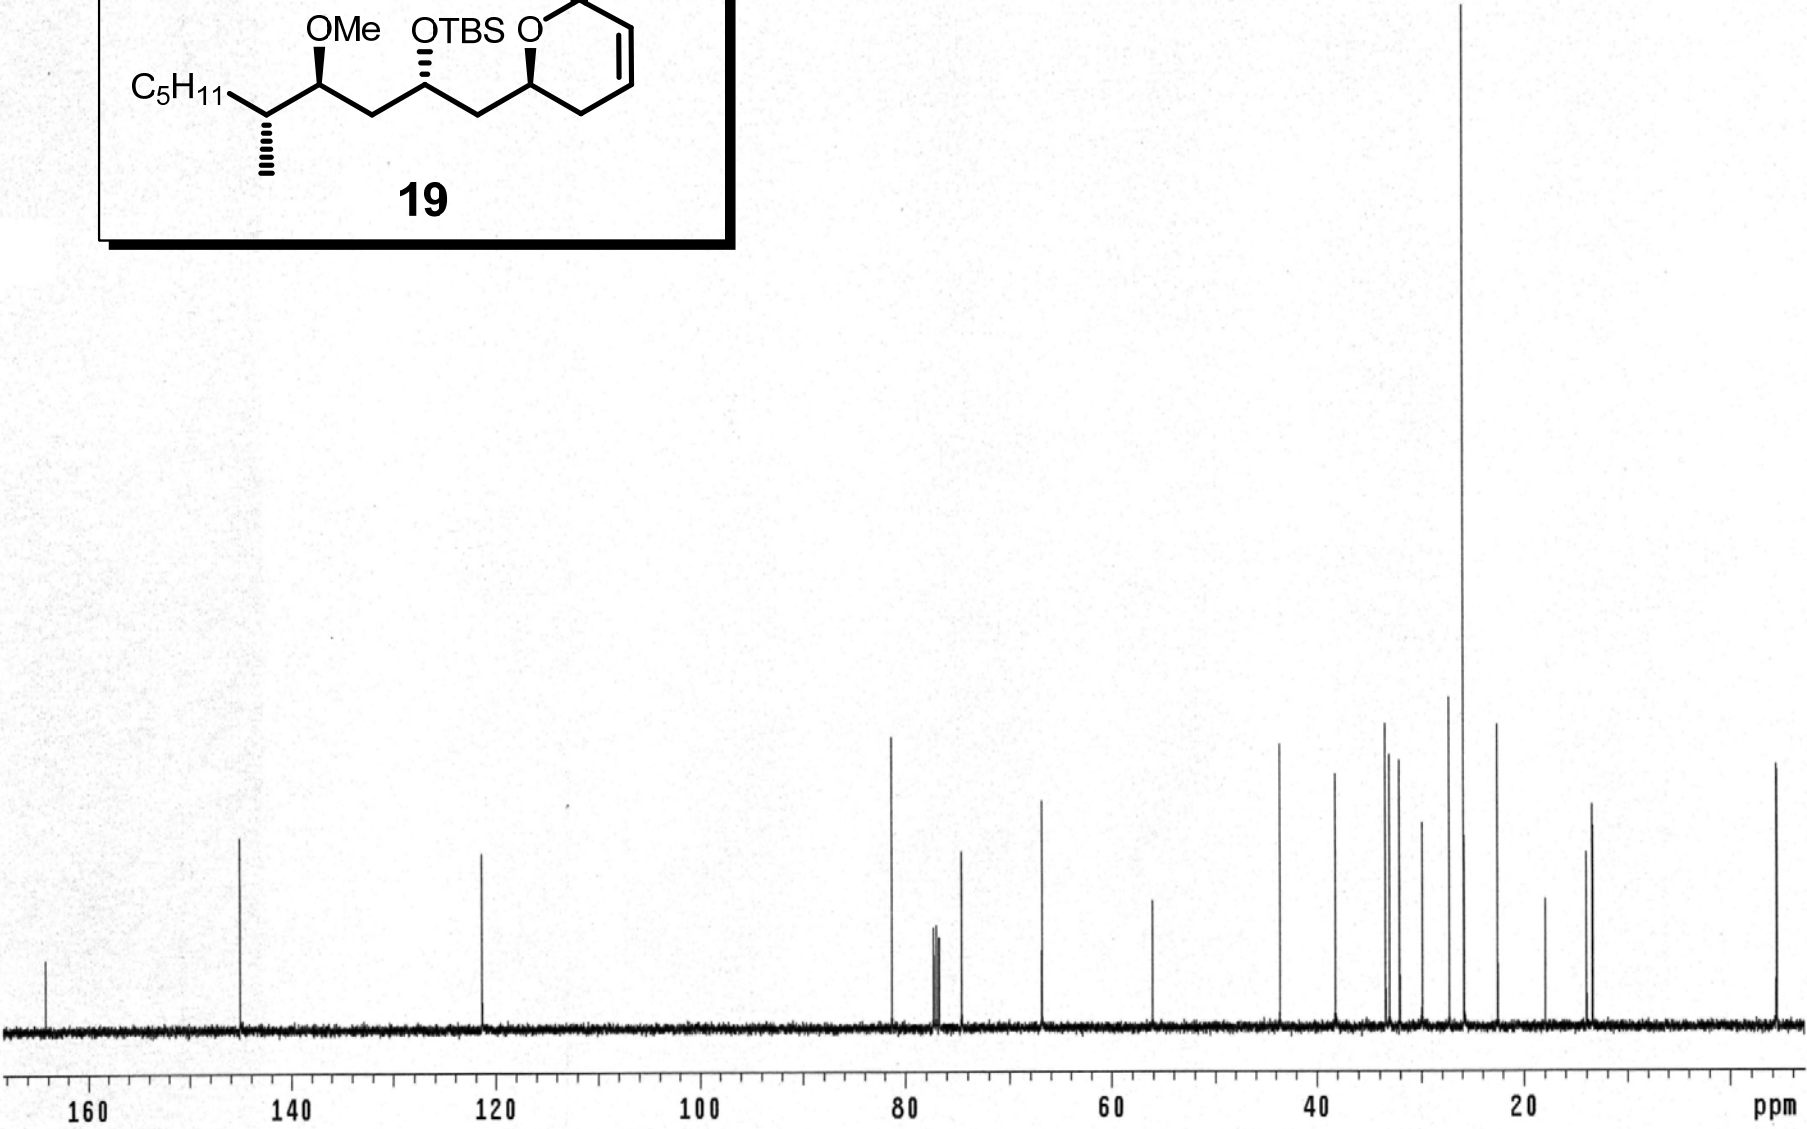

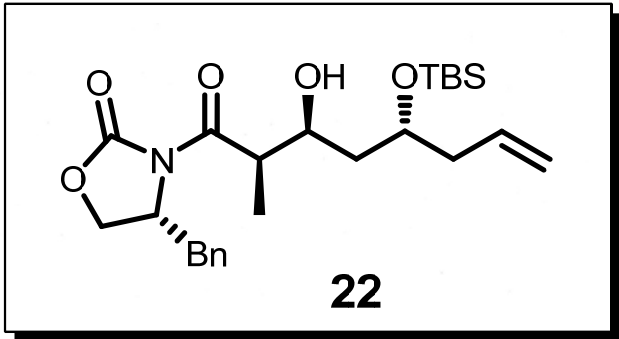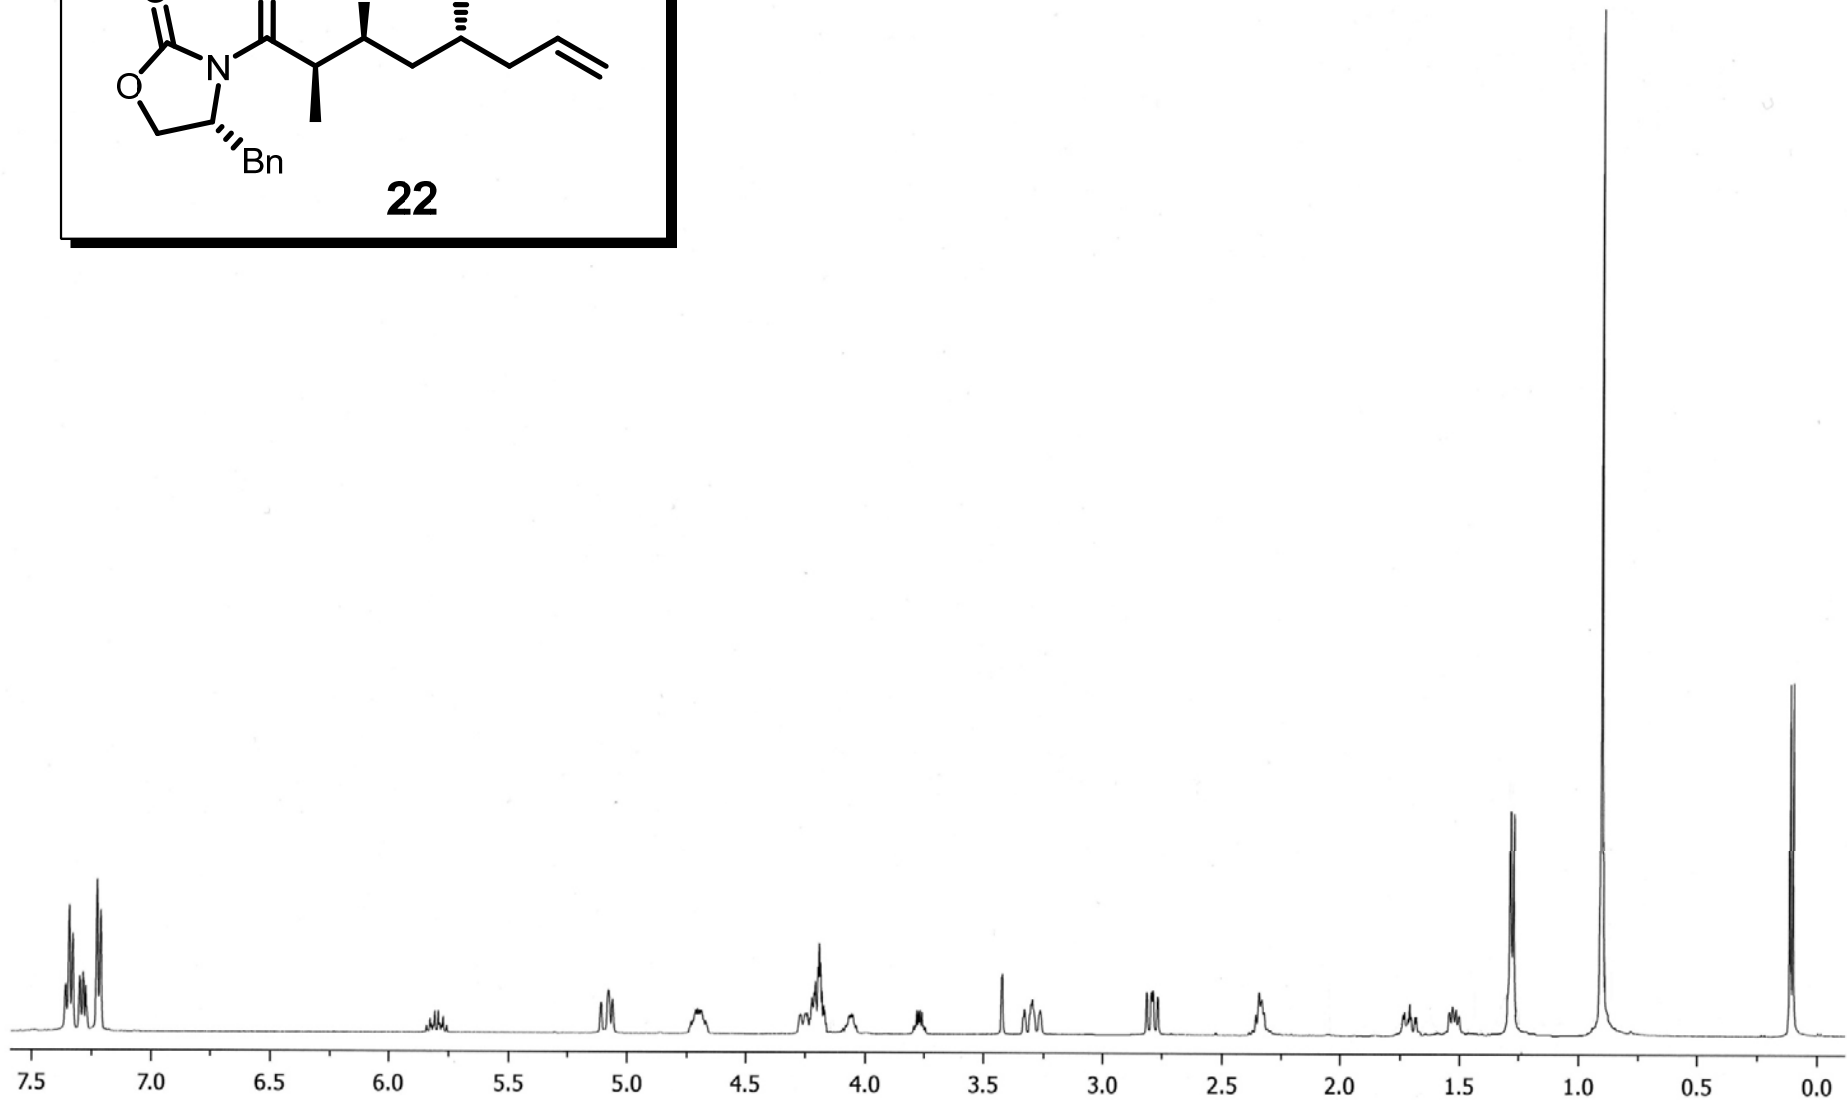

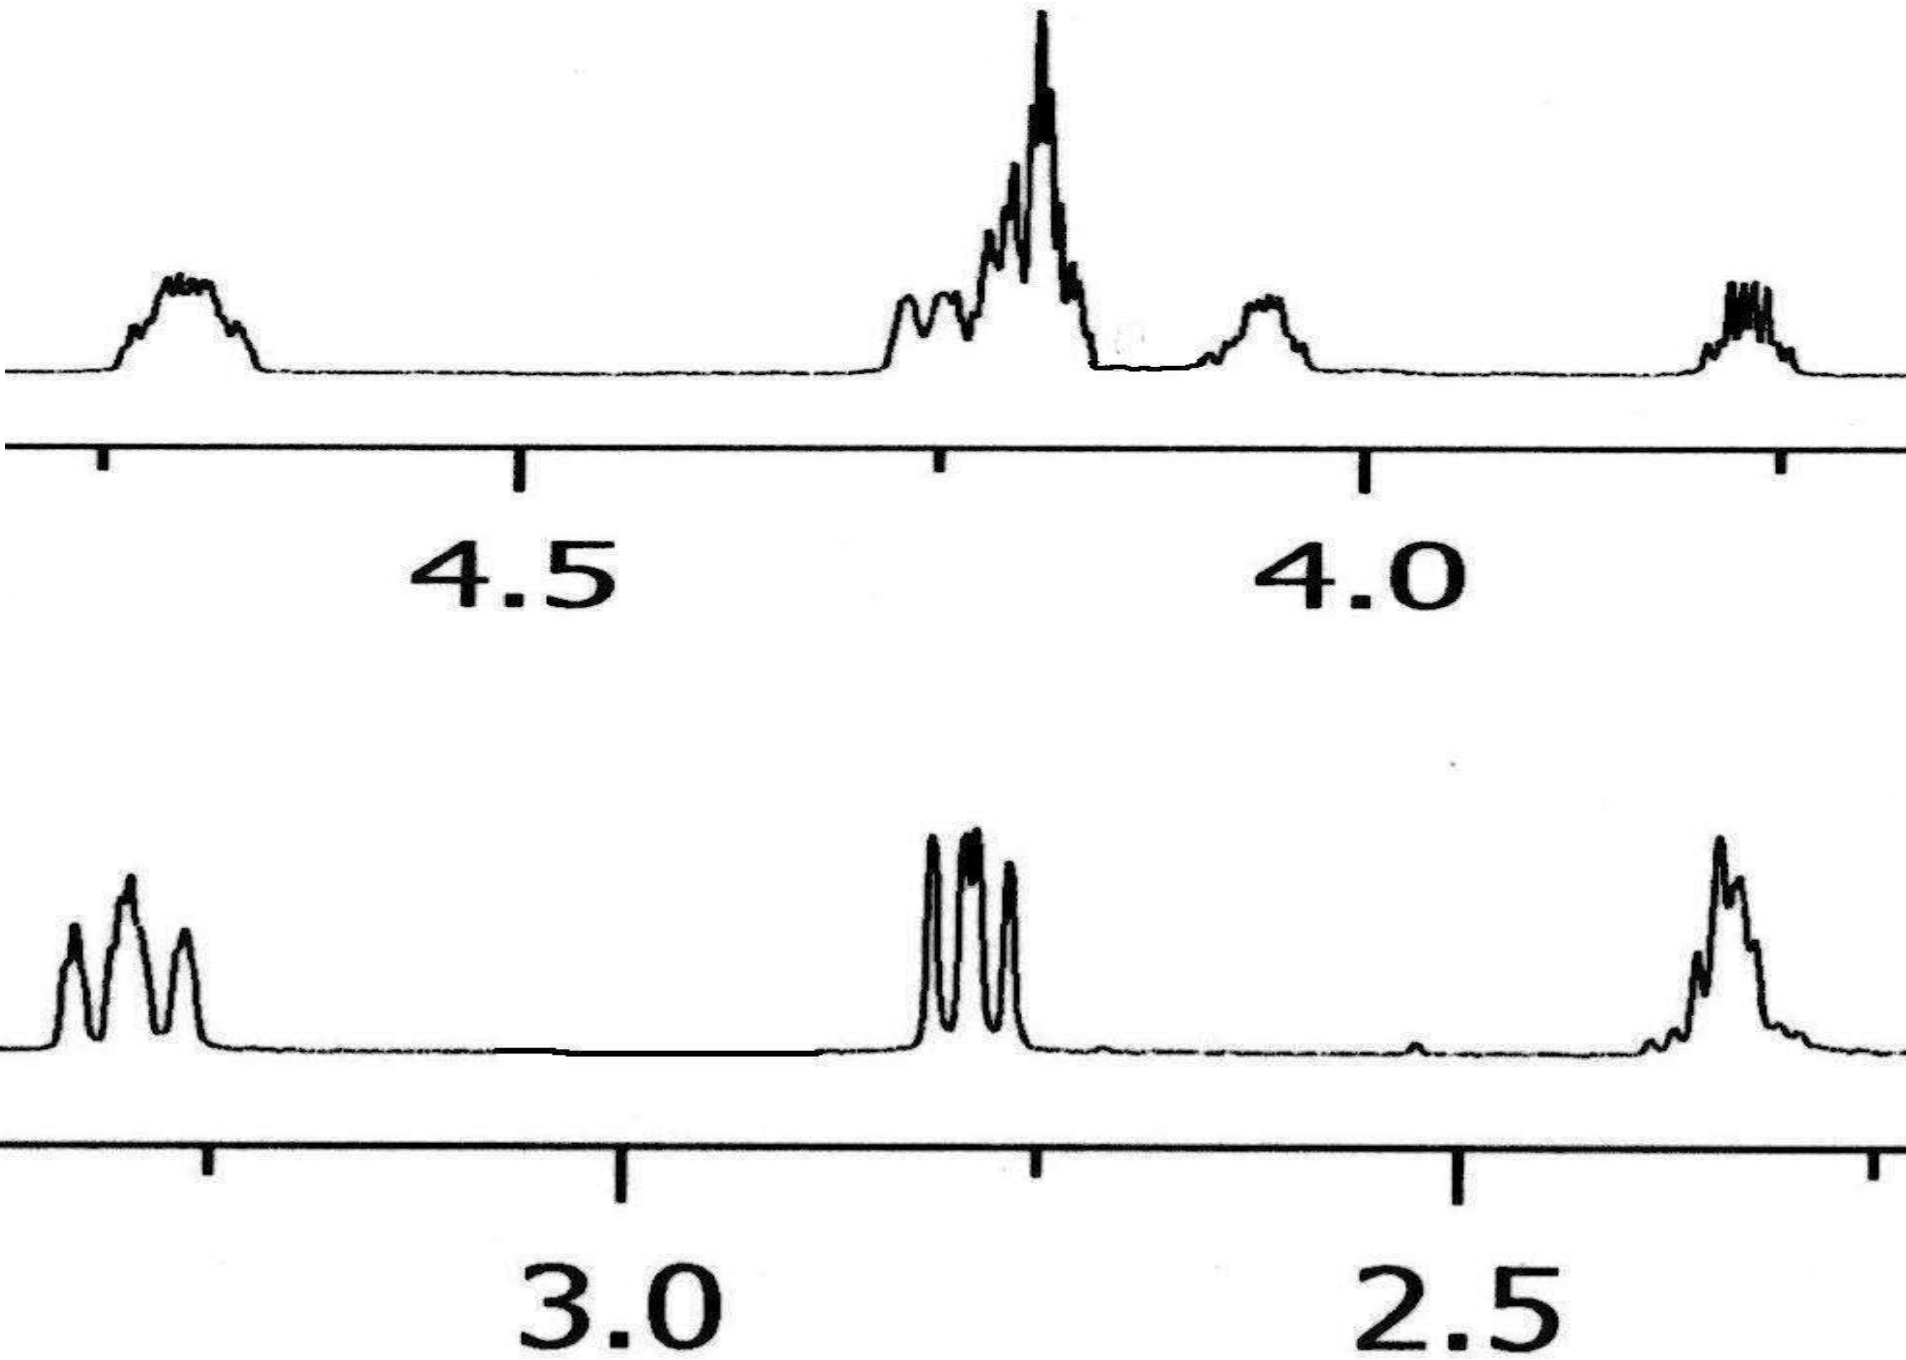

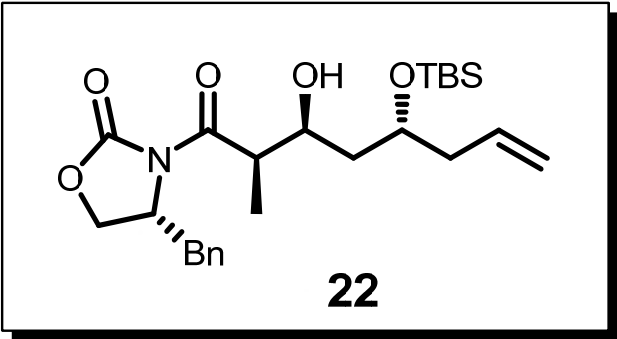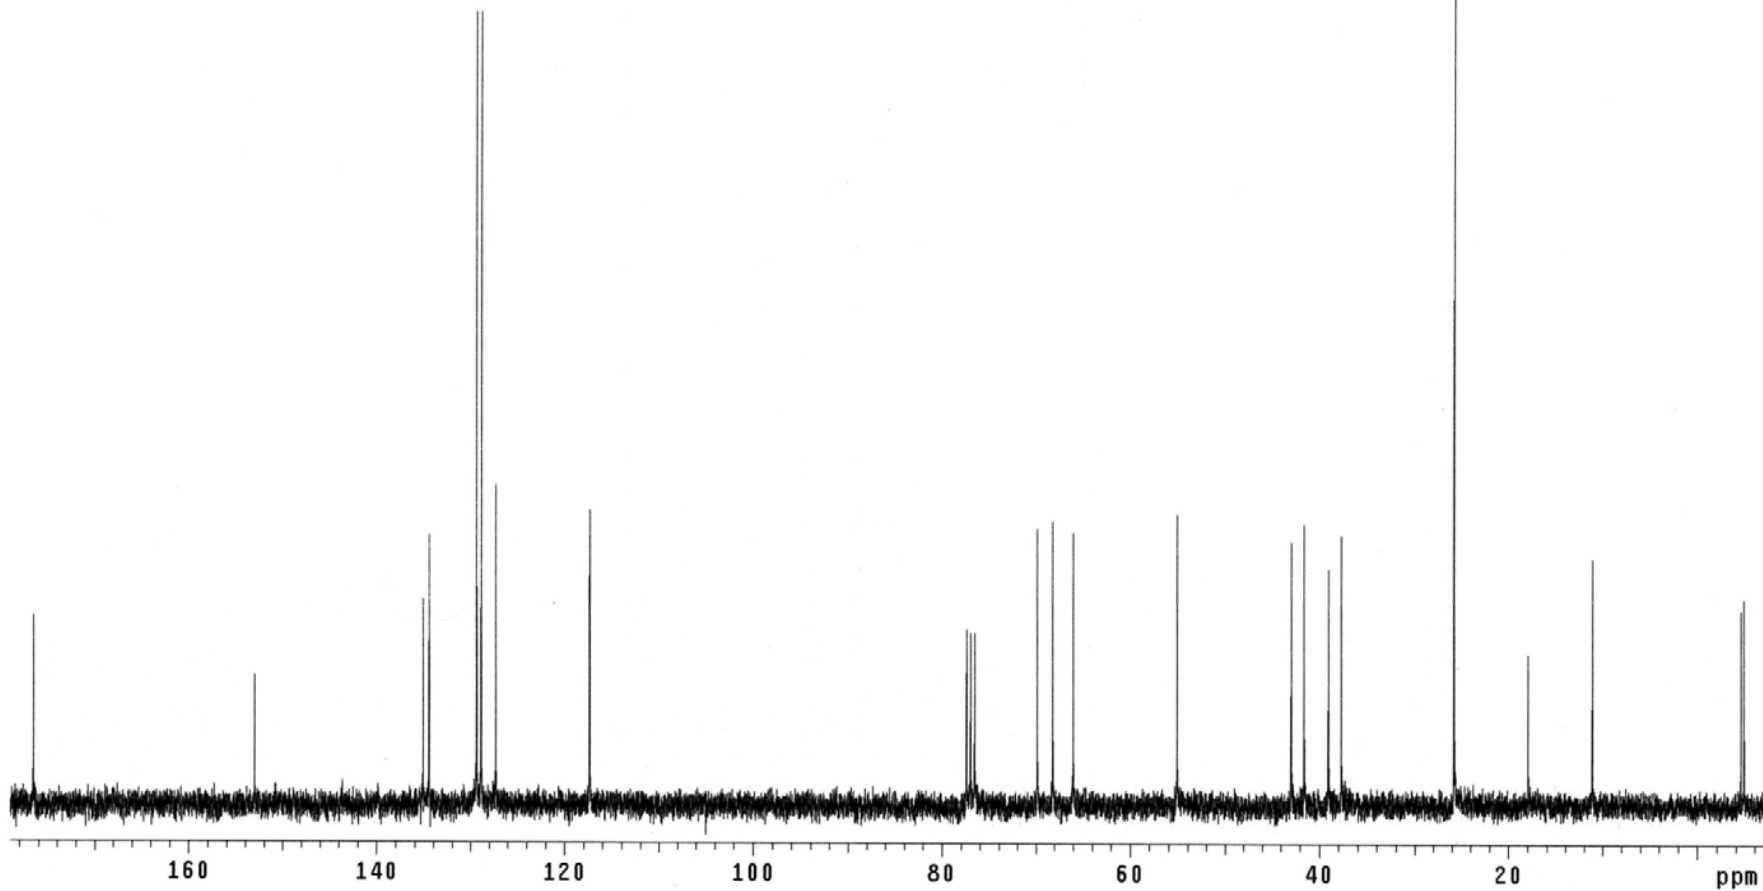

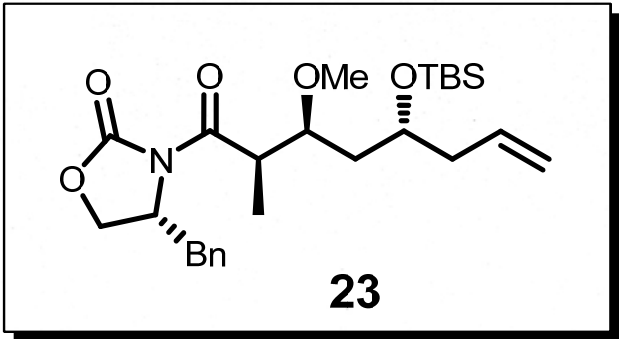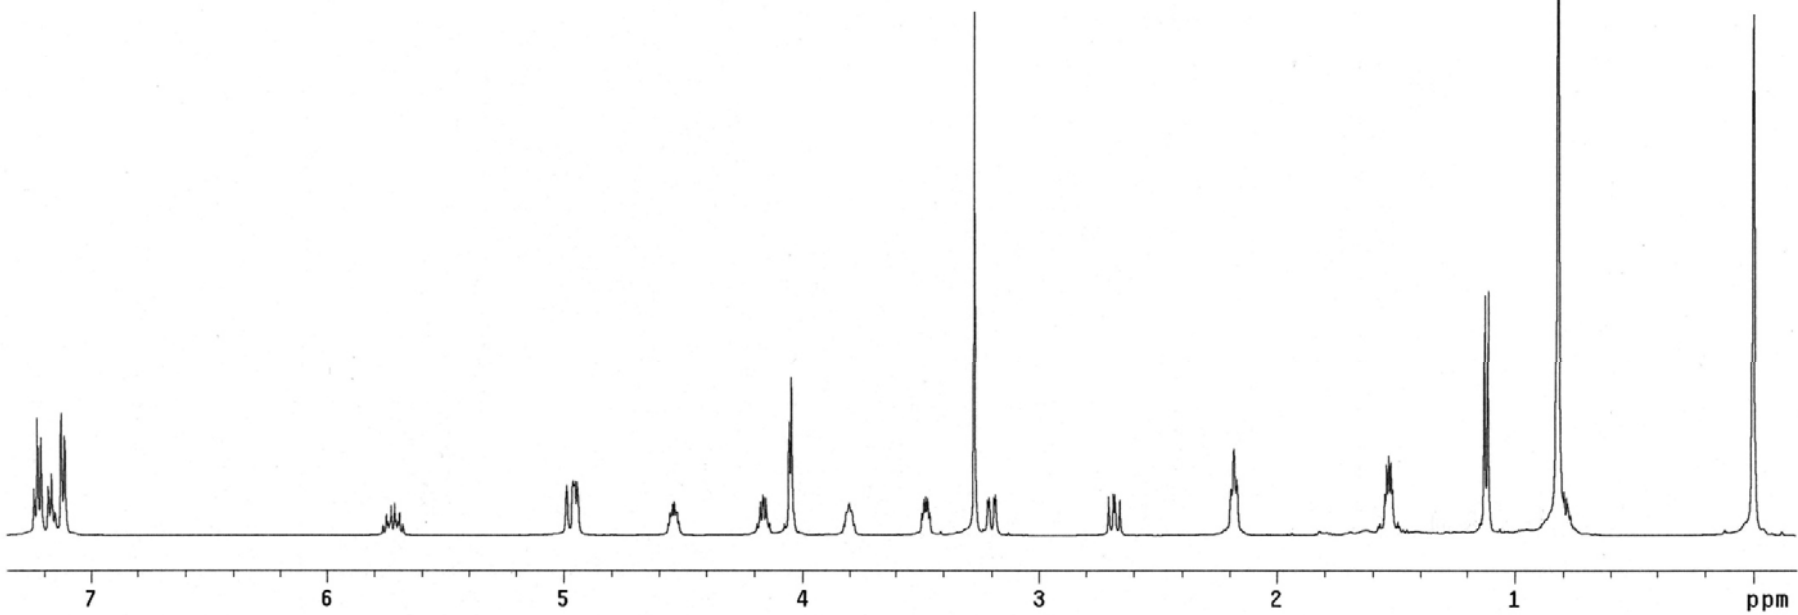



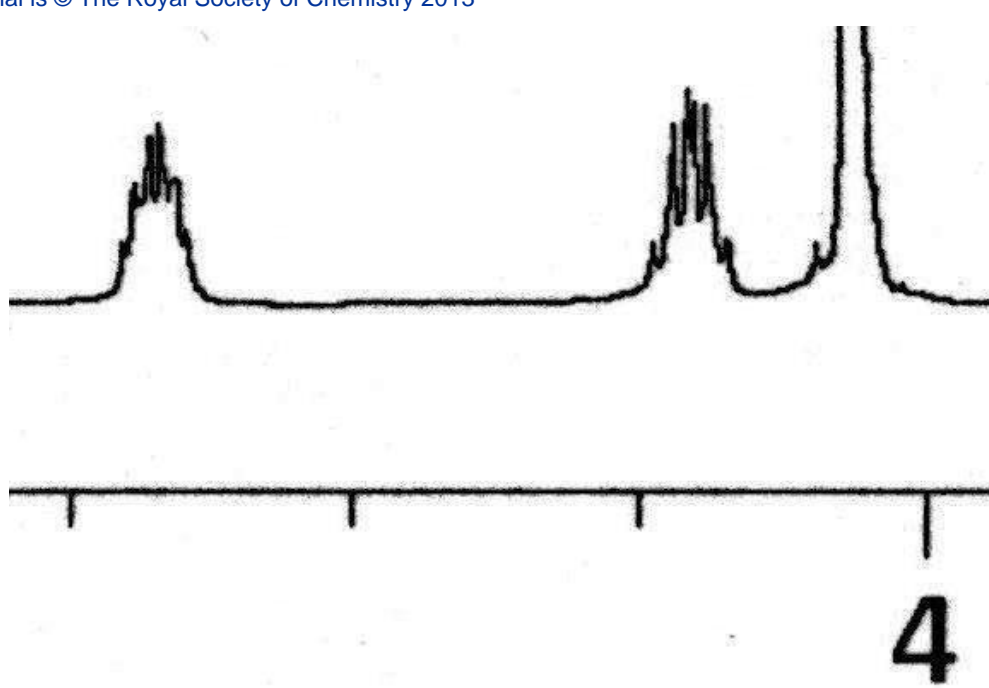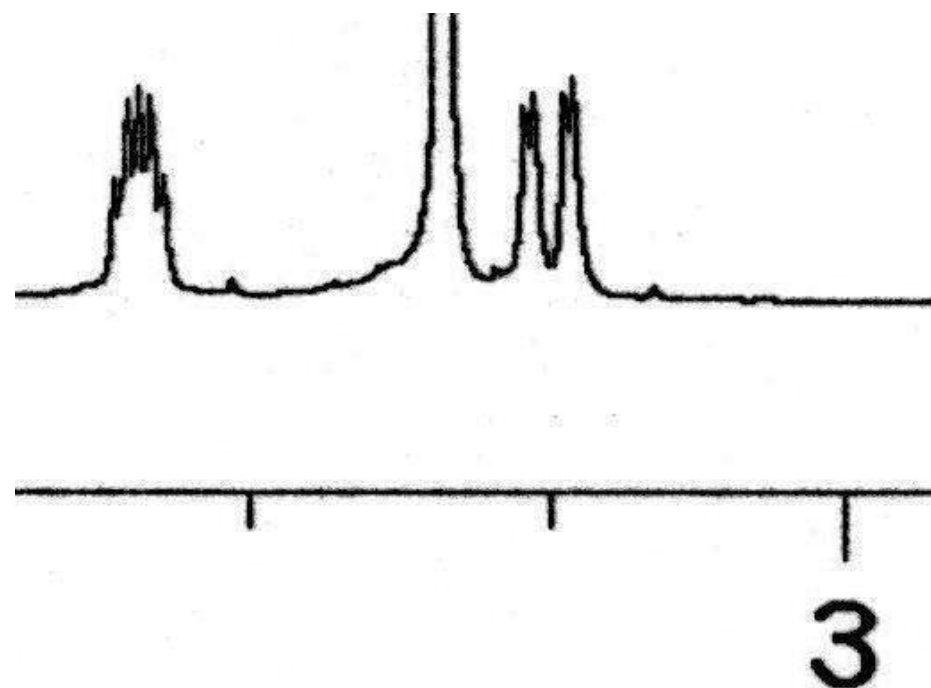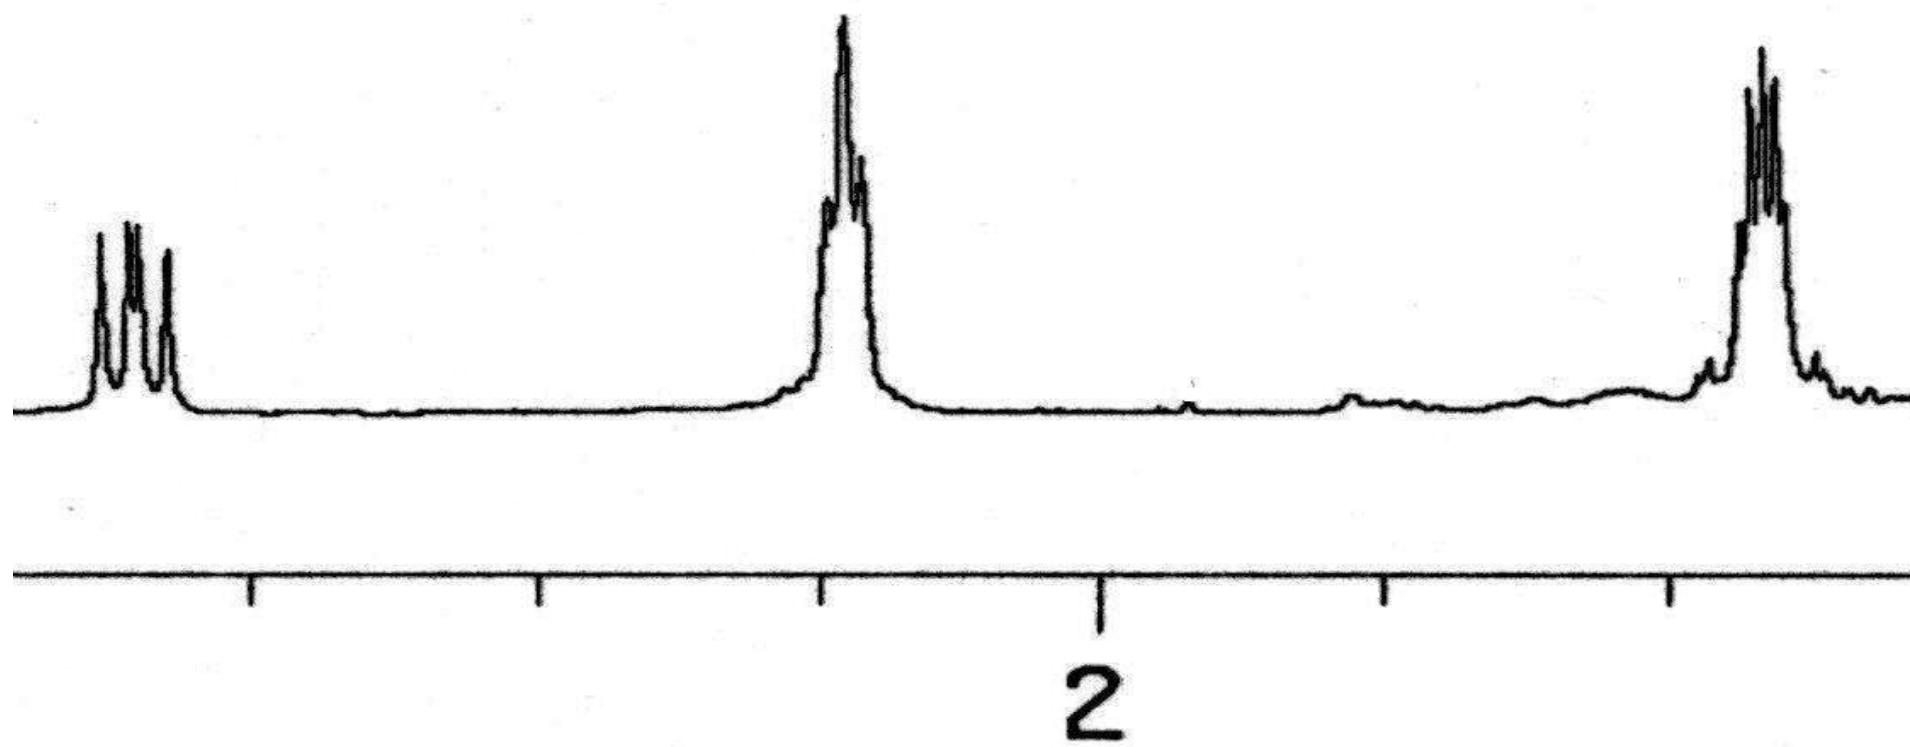



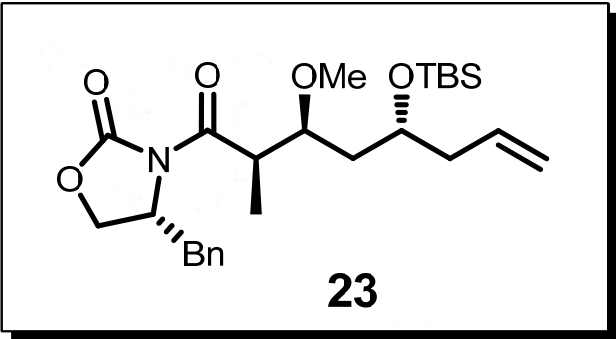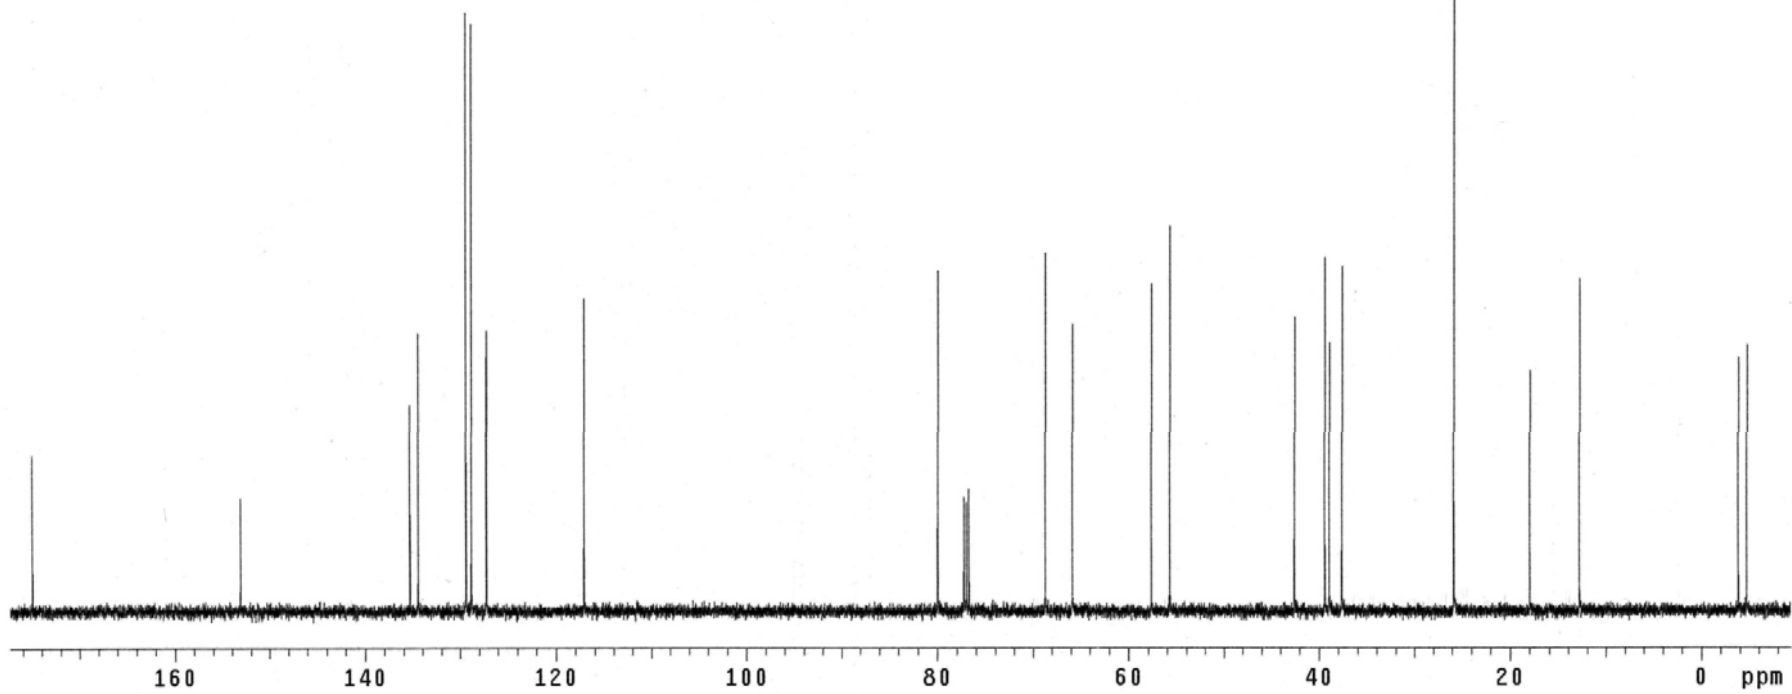

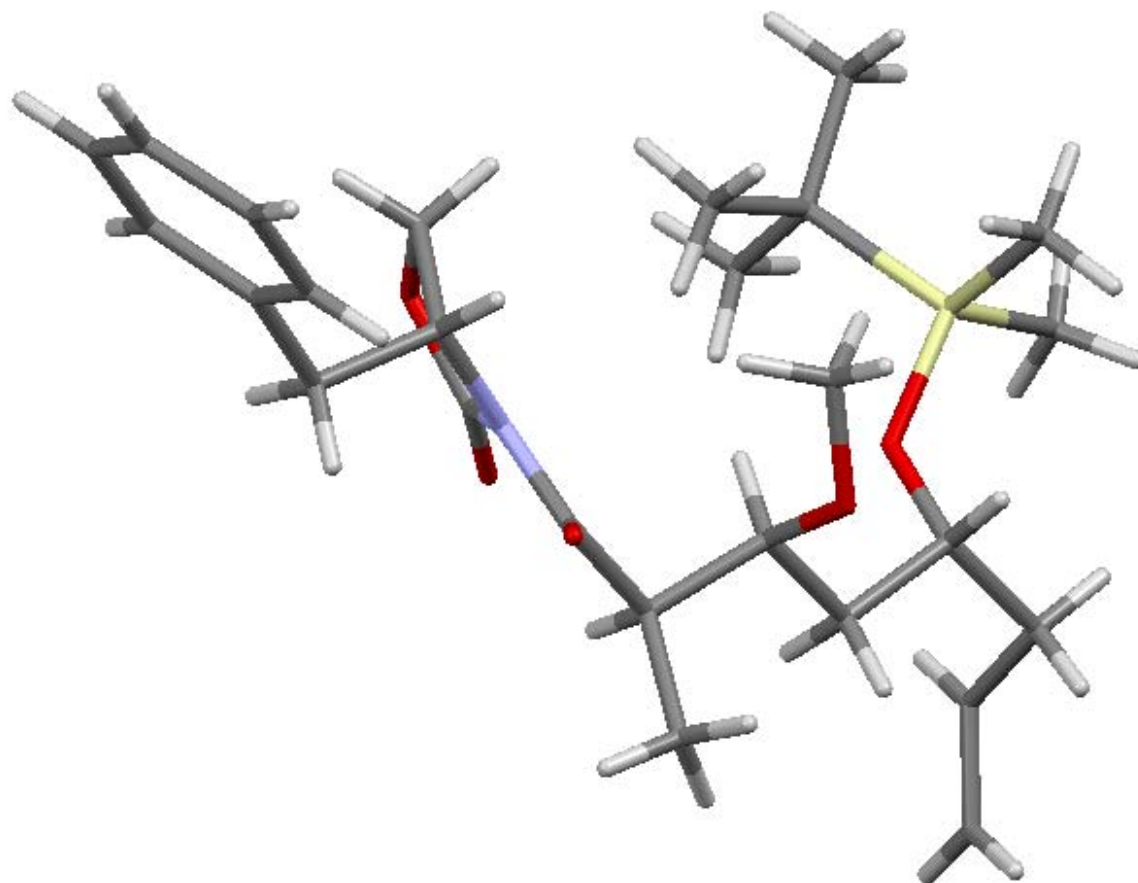

The crystal structure of compound **23** has been deposited at the Cambridge Crystallographic Data Centre and allocated the deposition number CCDC-917056.

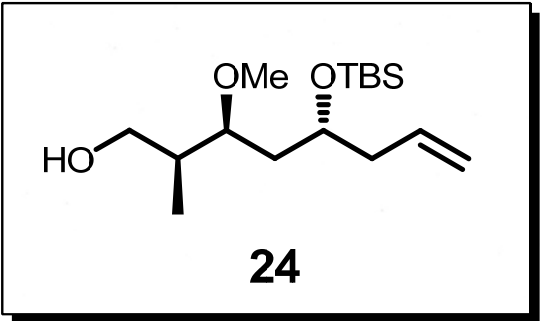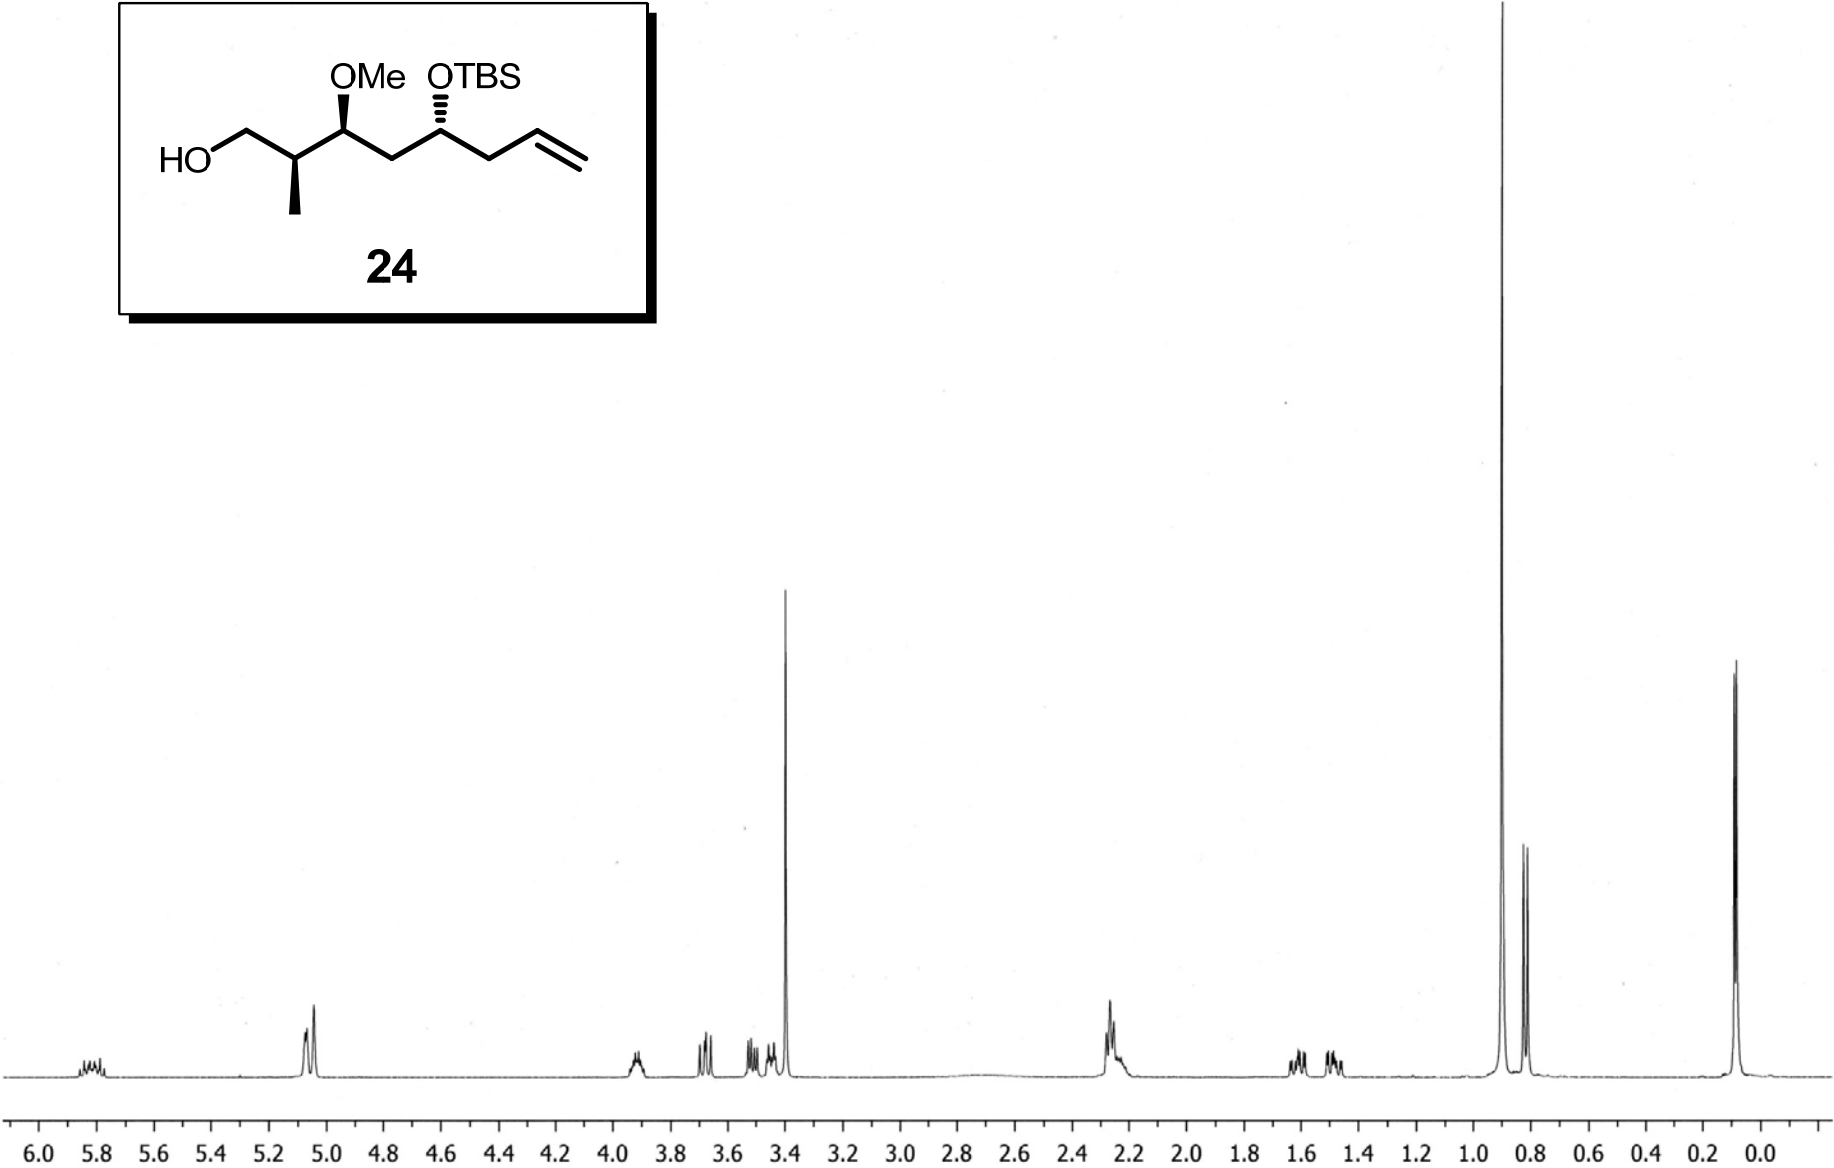

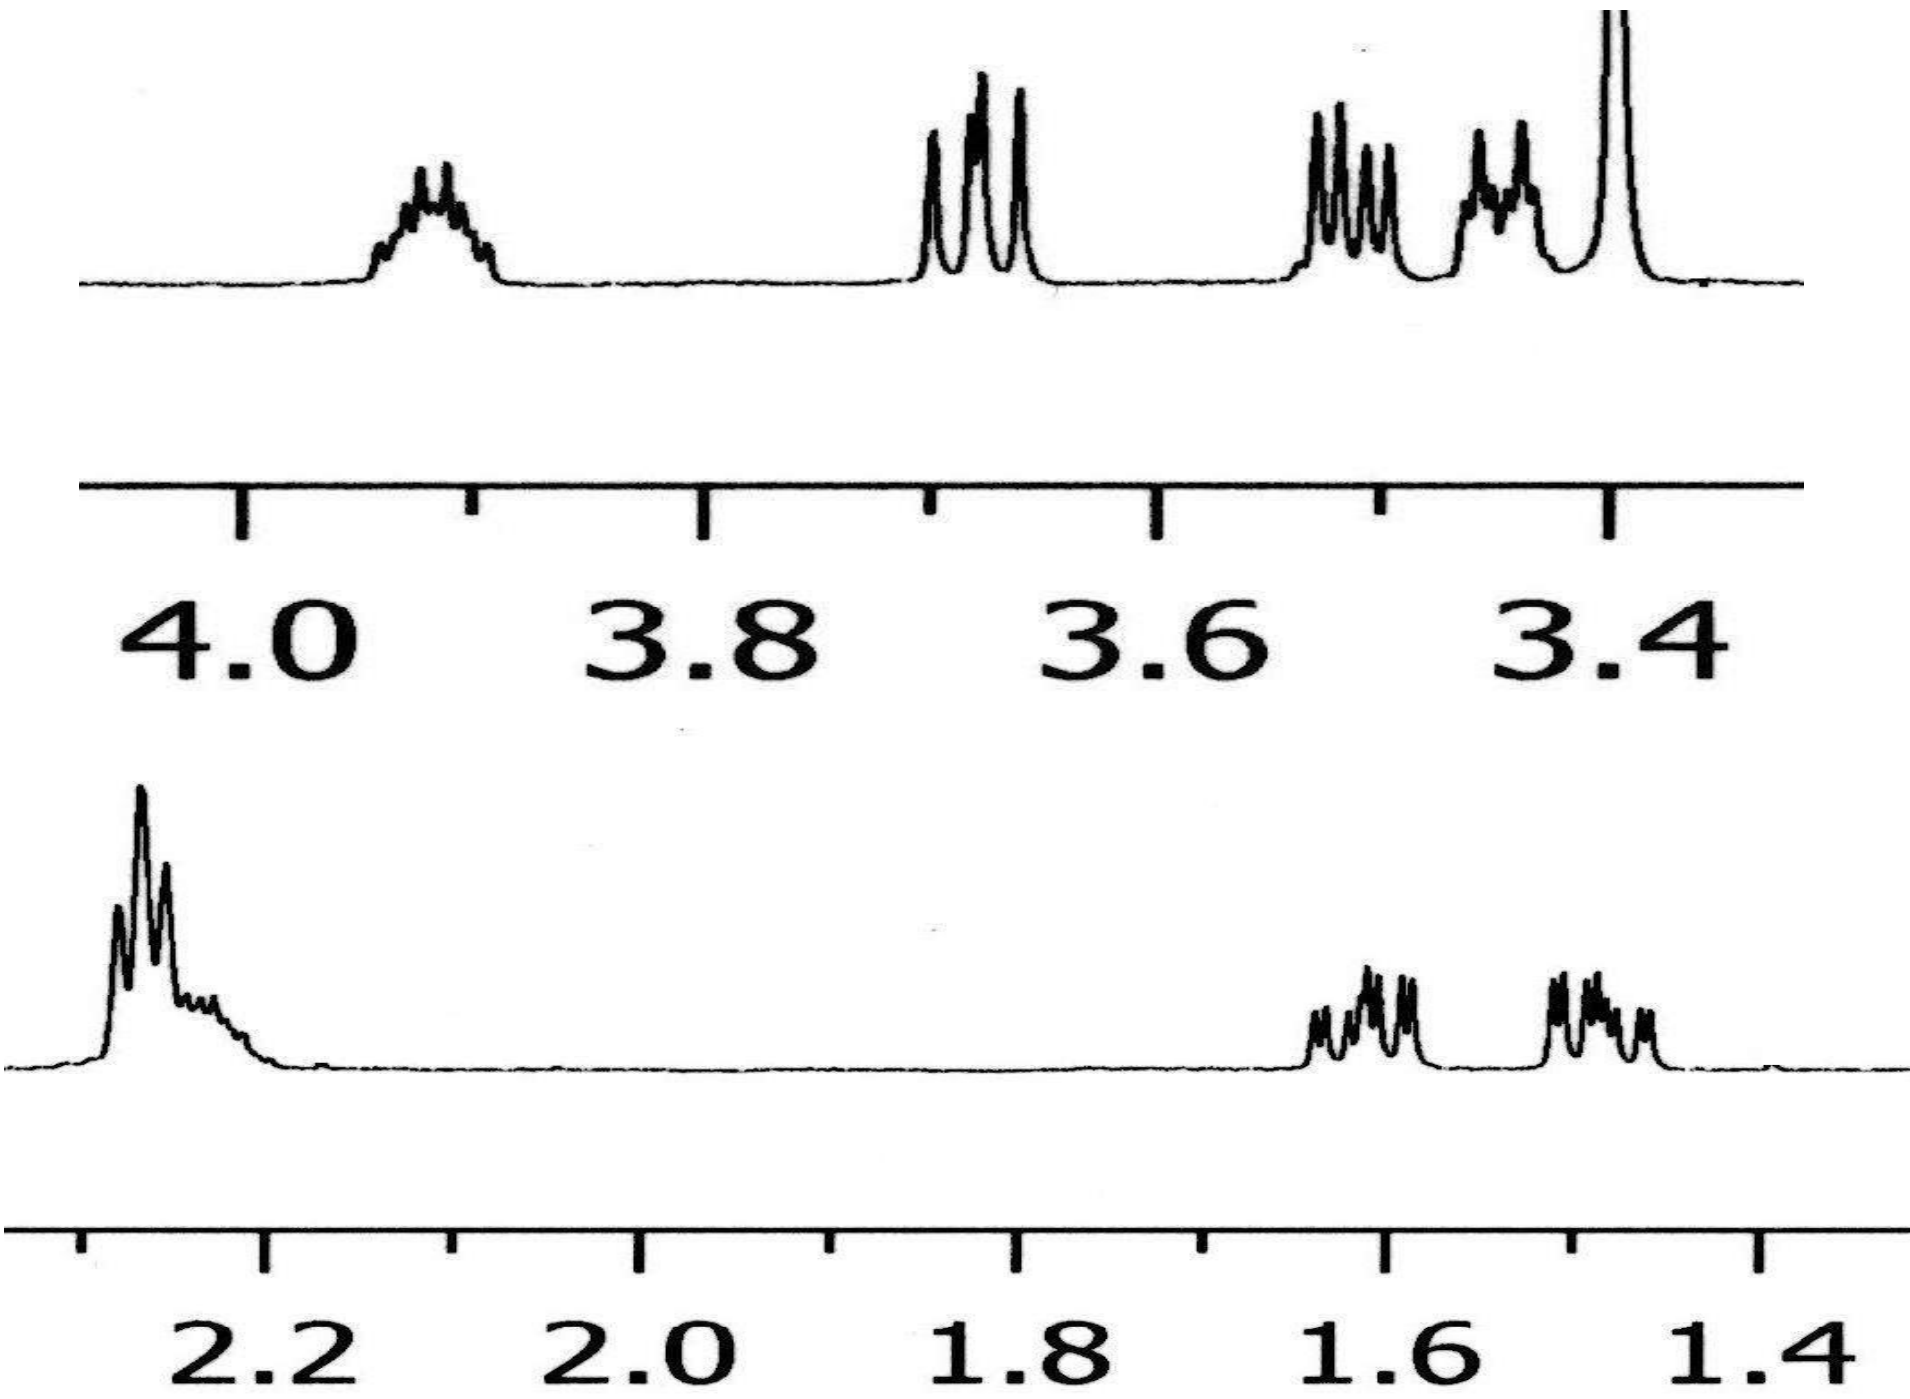

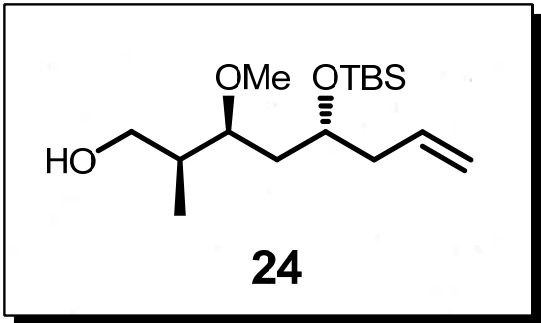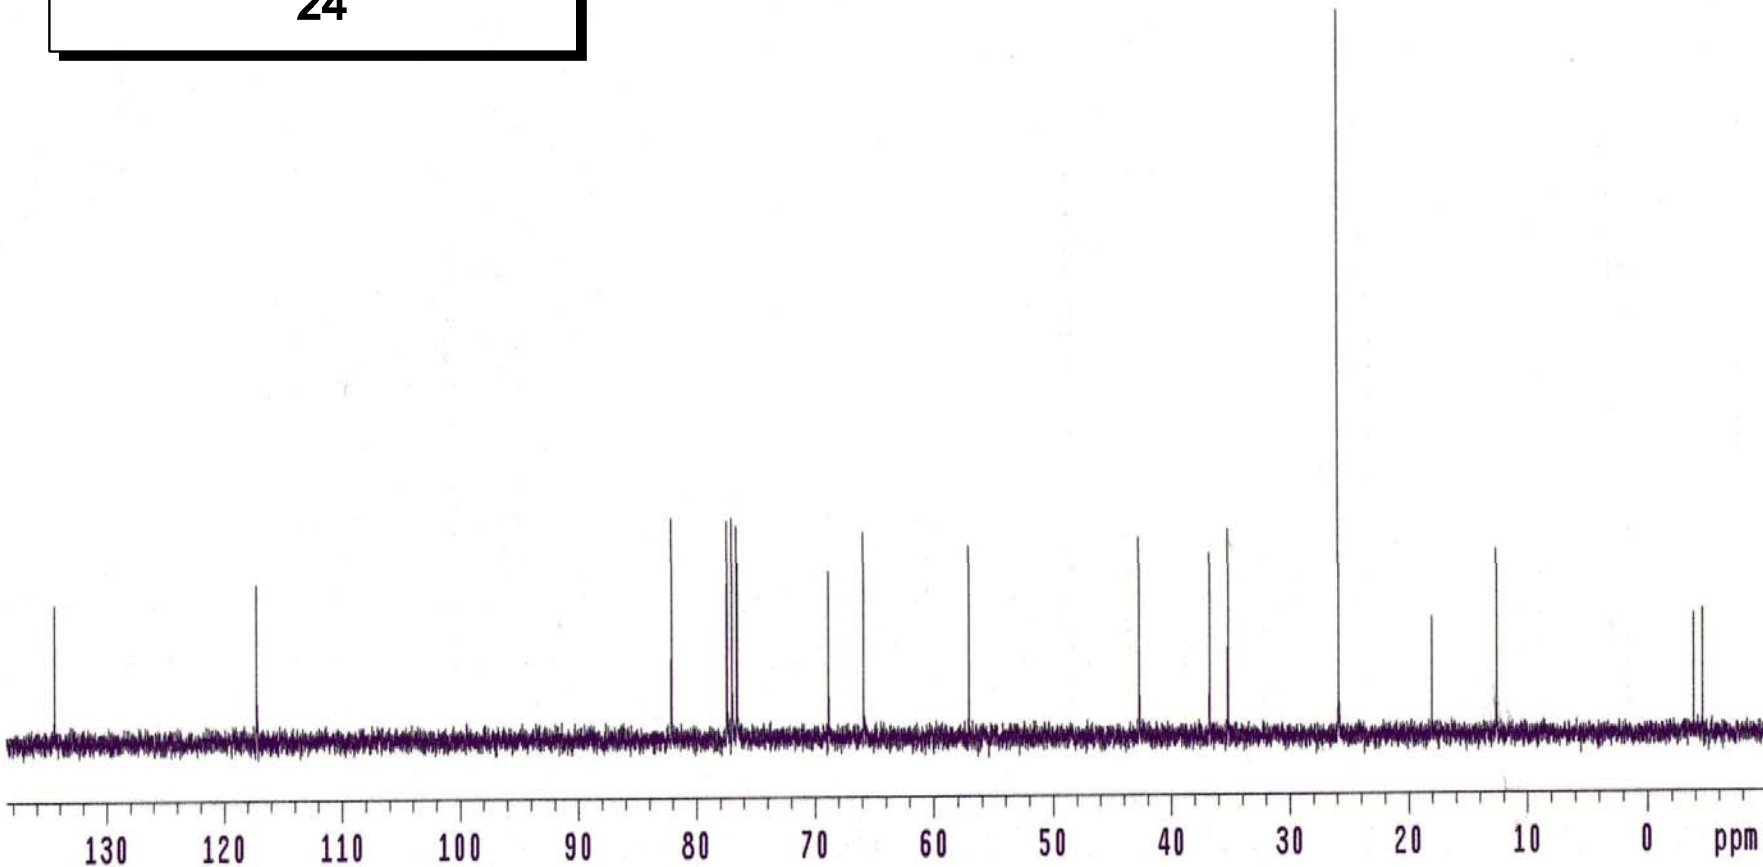

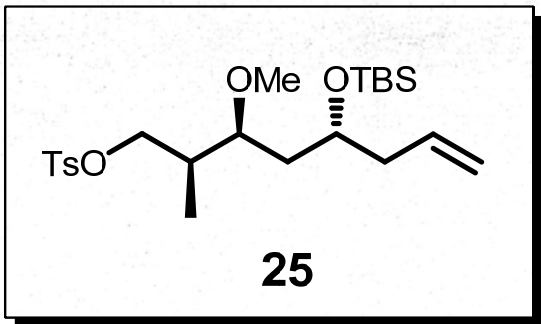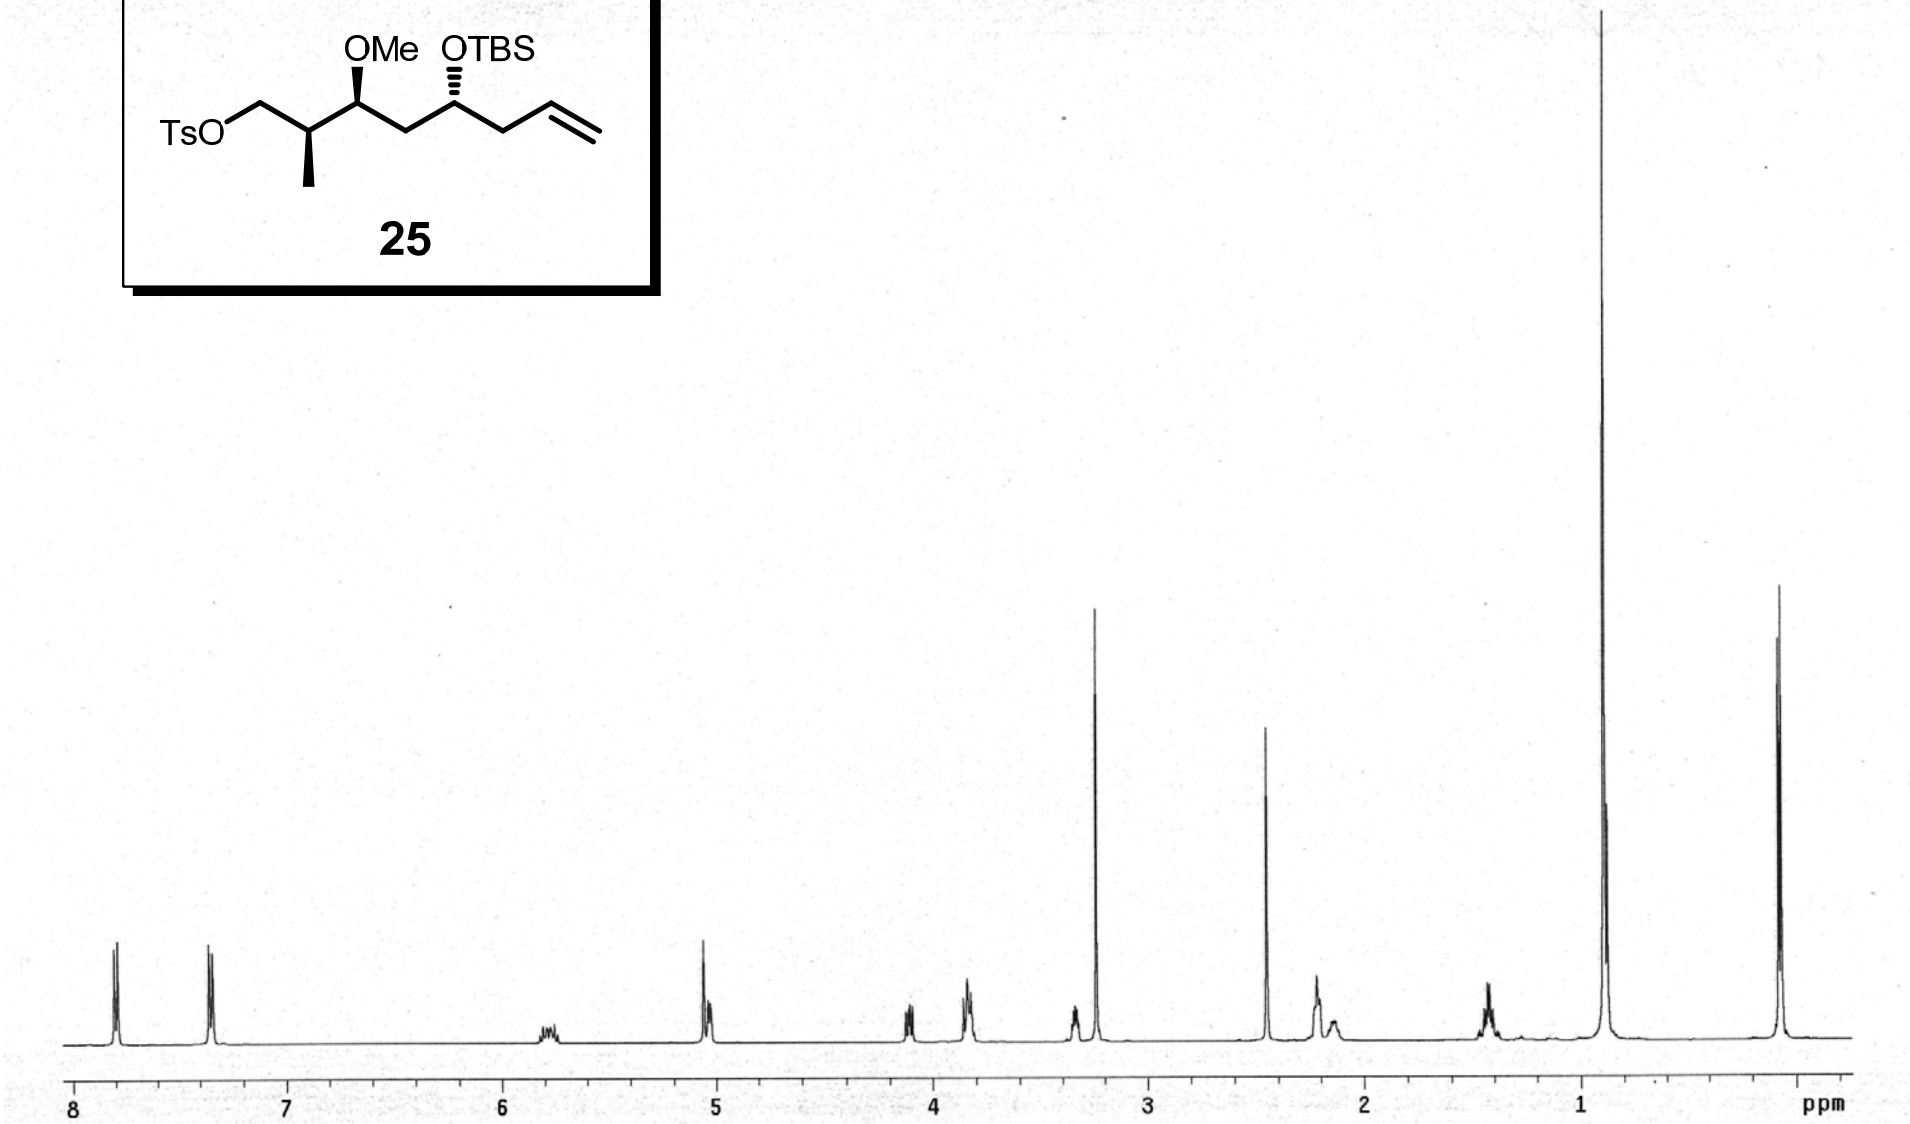

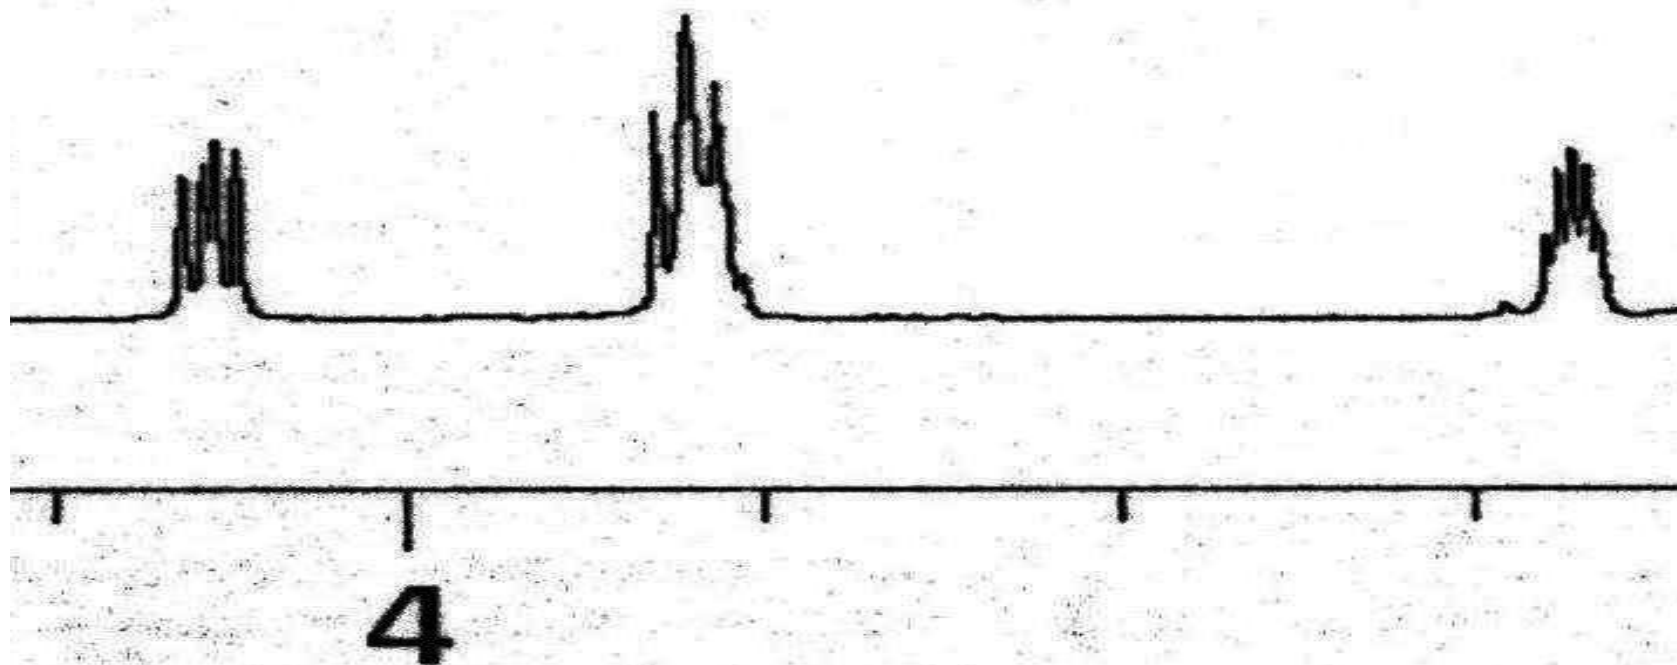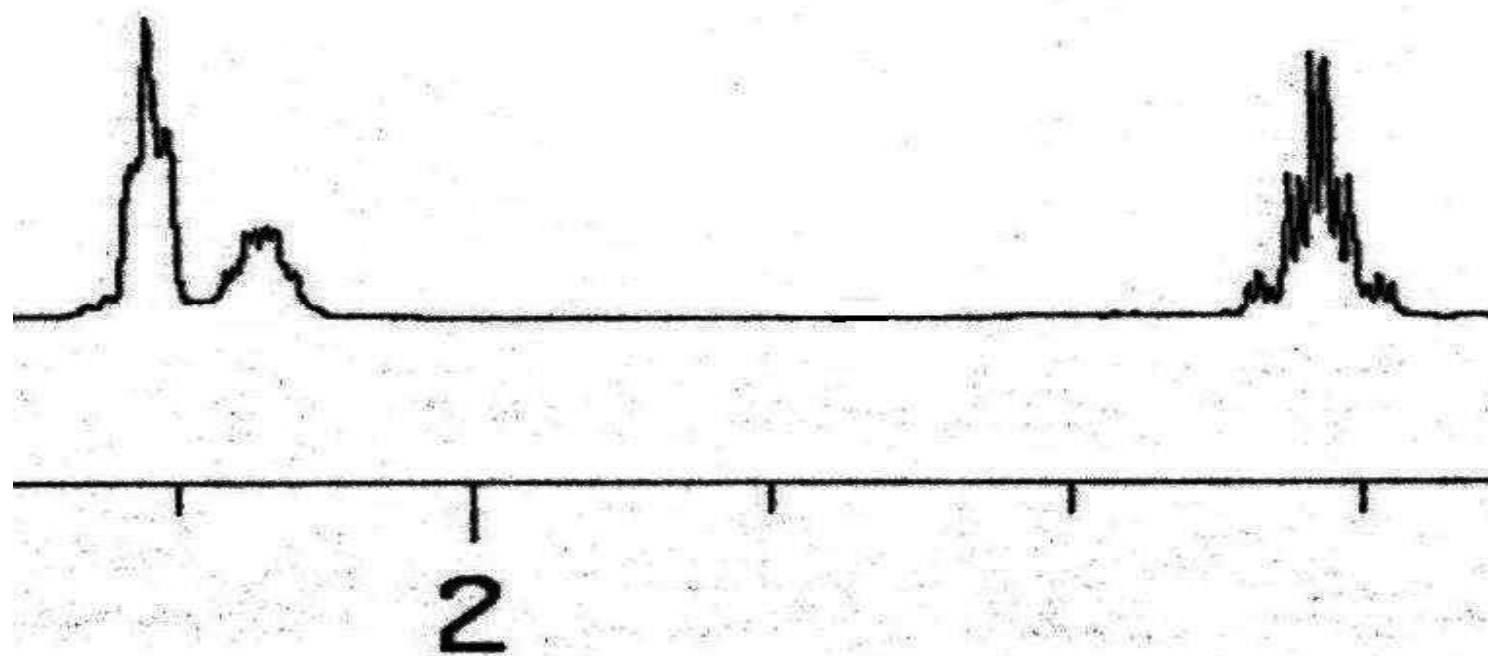

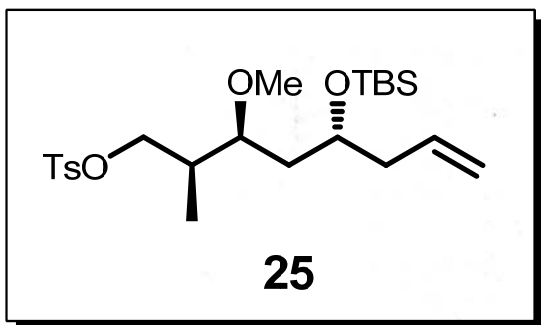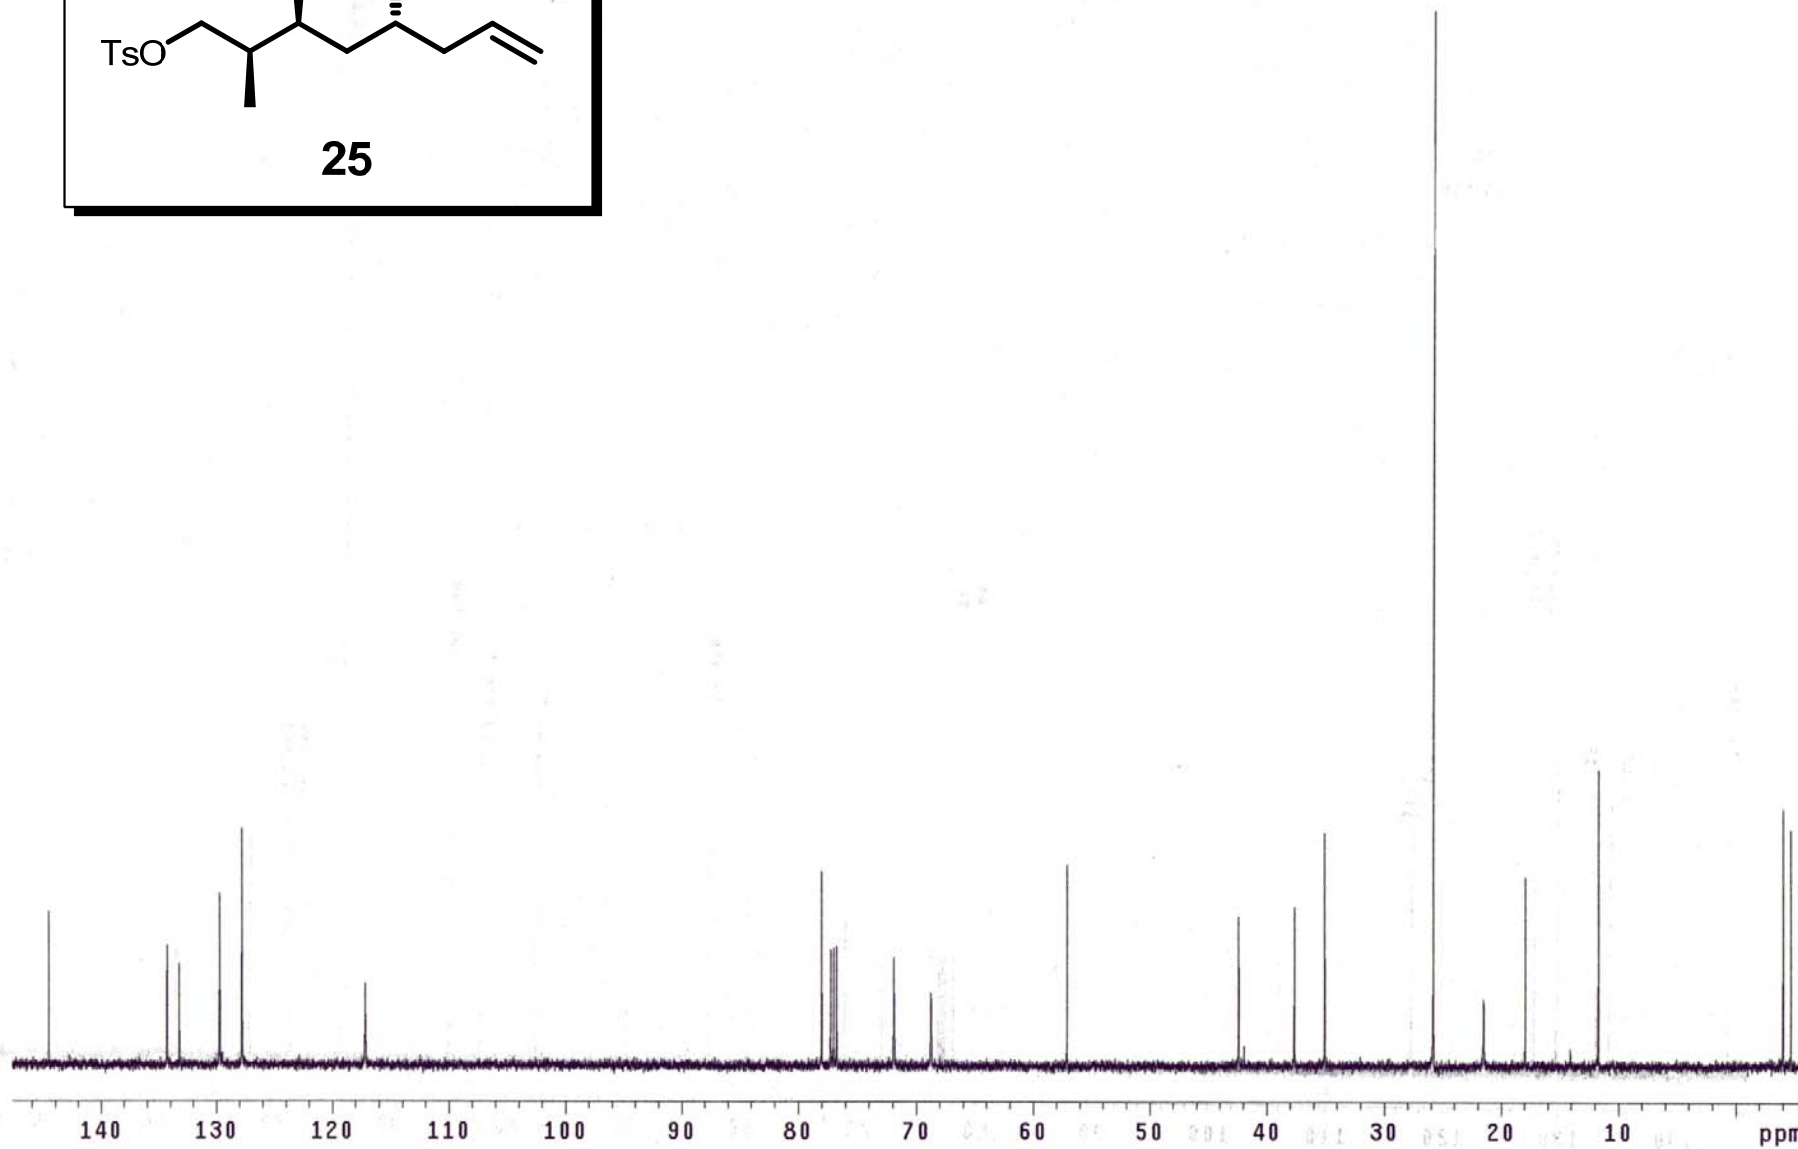

Supplement: c3ob40854j_2.pdf [file c3ob40854j_2.pdf]
